1 **One is not enough: on the effects of reference genome for the mapping and subsequent analyses**  
2 **of short-reads**

3

4 Carlos Valiente-Mullor<sup>1</sup>, Beatriz Beamud<sup>1,\*</sup>, Iván Ansari<sup>1</sup>, Carlos Francés-Cuesta<sup>1</sup>, Neris García-  
5 González<sup>1</sup>, Lorena Mejía<sup>1</sup>, Paula Ruiz-Hueso<sup>1</sup>, Fernando González-Candelas<sup>1,2,\*</sup>

6

7 1) Joint Research Unit “Infection and Public Health” FISABIO-University of Valencia, Institute  
8 for Integrative Systems Biology (I2SysBio), Valencia, Spain

9 2) CIBER in Epidemiology and Public Health, Valencia, Spain

10

11 \*Authors for correspondence

12

13 Beatriz Beamud, [beatriz.beamud@uv.es](mailto:beatriz.beamud@uv.es), +34 961925966

14 Fernando González-Candelas, [fernando.gonzalez@uv.es](mailto:fernando.gonzalez@uv.es), +34 961925961

## 15 **Abstract**

16 Mapping of high-throughput sequencing (HTS) reads to a single arbitrary reference genome is a  
17 frequently used approach in microbial genomics. However, the choice of a reference may represent a  
18 source of errors that may affect subsequent analyses such as the detection of single nucleotide  
19 polymorphisms (SNPs) and phylogenetic inference. In this work, we evaluated the effect of reference  
20 choice on short-read sequence data from five clinically and epidemiologically relevant bacteria  
21 (*Klebsiella pneumoniae*, *Legionella pneumophila*, *Neisseria gonorrhoeae*, *Pseudomonas aeruginosa*  
22 and *Serratia marcescens*). Publicly available whole-genome assemblies encompassing the genomic  
23 diversity of these species were selected as reference sequences, and read alignment statistics, SNP  
24 calling, recombination rates, dN/dS ratios, and phylogenetic trees were evaluated depending on the  
25 mapping reference. The choice of different reference genomes proved to have an impact on almost all  
26 the parameters considered in the five species. In addition, these biases had potential epidemiological  
27 implications such as including/excluding isolates of particular clades and the estimation of genetic  
28 distances. These findings suggest that the single reference approach might introduce systematic errors  
29 during mapping that affect subsequent analyses, particularly for data sets with isolates from  
30 genetically diverse backgrounds. In any case, exploring the effects of different references on the final  
31 conclusions is highly recommended.

32

## 33 **Author summary**

34 Mapping consists in the alignment of reads (i.e., DNA fragments) obtained through high-throughput  
35 genome sequencing to a previously assembled reference sequence. It is a common practice in genomic  
36 studies to use a single reference for mapping, usually the ‘reference genome’ of a species—a high-  
37 quality assembly. However, the selection of an optimal reference is hindered by intrinsic intra-species  
38 genetic variability, particularly in bacteria. Biases/errors due to reference choice for mapping in  
39 bacteria have been identified. These are mainly originated in alignment errors due to genetic  
40 differences between the reference genome and the read sequences. Eventually, they could lead to  
41 misidentification of variants and biased reconstruction of phylogenetic trees (which reflect ancestry

42 between different bacterial lineages). However, a systematic work on the effects of reference choice  
43 in different bacterial species is still missing, particularly regarding its impact on phylogenies. This  
44 work intended to fill that gap. The impact of reference choice has proved to be pervasive in the five  
45 bacterial species that we have studied and, in some cases, alterations in phylogenetic trees could lead  
46 to incorrect epidemiological inferences. Hence, the use of different reference genomes may be  
47 prescriptive to assess the potential biases of mapping.

48

## 49 **Introduction**

50 The development and increasing availability of high-throughput sequencing (HTS) technologies,  
51 along with bioinformatic tools to process large amounts of genomic data, has facilitated the in depth  
52 study of evolutionary and epidemiological dynamics of microorganisms [1–3]. Whole-genome  
53 sequencing (WGS)-based approaches are useful to infer phylogenetic relationships between large sets  
54 of clinical isolates [4–7], showing improved resolution for molecular epidemiology [8–11] compared  
55 to traditional typing methods [12–14]. Short-read mapping against a single reference sequence is a  
56 commonly used approach in bacterial genomics for genome reconstruction of sequenced isolates and  
57 variant detection [4,6,15–17]. Nevertheless, there are grounds for suspecting that this approach might  
58 introduce biases depending on the reference used for mapping. Most of these errors originate in the  
59 genetic differences between the reference and the read sequence data [18–21], and they can affect  
60 subsequent analyses [22–28]. These include the identification of variants throughout the genome  
61 (mainly single nucleotide polymorphisms [SNPs]) and phylogenetic tree construction, which are  
62 essential steps for epidemiological and evolutionary inferences.

63

64 Sequencing status, completeness, assembly quality and annotation are relevant factors in reference  
65 selection, which explain the widespread use of the NCBI-defined reference genome of a species for  
66 mapping [26,28]. However, these criteria do not necessarily account for the amount of genetic  
67 information shared between the reference and subject sequences [29], neither the intrinsic genomic  
68 variability of the different bacterial species, which is reflected in their pangenomes (i.e., the total gene

69 set within a species or within a particular sequence data set) [30]. It has been suggested that the  
70 impact of reference selection in clonal bacteria such as *Mycobacterium tuberculosis* [31] could be  
71 ameliorated by its limited variability at the intra-species level [25,28], although its effects on  
72 epidemiological inferences have been described [32]. In contrast, we expect a greater impact of  
73 reference choice in species with open pangenomes (e.g., *Pseudomonas aeruginosa* [33]) and/or highly  
74 recombinogenic bacteria (e.g., *Neisseria gonorrhoeae* [34] or *Legionella pneumophila* [35]). In spite  
75 of the awareness of the problem of reference selection considering the high genomic diversity of most  
76 bacterial species, systematic studies on the effect of reference choice in bacterial data sets are still  
77 missing, particularly if we are concerned with the consequences on epidemiological or evolutionary  
78 inferences. In addition, previous studies considering reference selection explicitly have been mainly  
79 focused on biases in SNP calling [23,24,28] and have not addressed other possible implications.

80

81 *De novo* assembly of read sequence data dispense with the need of using a reference genome.  
82 However, this requires higher sequencing coverage and longer reads in order to obtain enough read  
83 overlap at each position of the genome. Therefore, obtaining unfinished or fragmented assemblies is a  
84 major drawback, particularly when using short-reads (which still are the most frequently used in HTS-  
85 based studies) [36]. Complementarily, *de novo* assembled isolates could be used as reference genomes  
86 if previously assembled, high-quality references are found to be suboptimal in terms of genetic  
87 relatedness to the newly sequenced isolates [12,32,37]. However, this solution still has to deal with  
88 the additional costs of long-read sequencing and mapping errors derived from using a low-quality or  
89 fragmented reference.

90

91 In this work, we have analyzed the effect of reference selection on the analysis of short-read sequence  
92 data sets from five clinically and epidemiologically relevant bacteria (*Klebsiella pneumoniae*,  
93 *Legionella pneumophila*, *Neisseria gonorrhoeae*, *Pseudomonas aeruginosa* and *Serratia marcescens*)  
94 with different core and pangenome sizes [38–41]. WGS data sets were mapped to different complete  
95 and publicly available reference genomes, encompassing the currently sequenced genomic diversity  
96 of each species. We have studied the effect of reference choice on mapping statistics (mapped reads,

97 reference genome coverage, average depth), SNP calling, phylogenetic inference (tree congruence and  
98 topology) as well as parameters of interest from an evolutionary perspective such as the inference of  
99 natural selection and recombination rates. Particular emphasis has been given to the effects of  
100 reference selection that result in misleading epidemiological inferences.

101

## 102 **Results**

### 103 **Selection of reference genomes**

104 Complete genome sequences of five pathogenic bacterial species were downloaded from GenBank.  
105 These included *K. pneumoniae* (270 genomes), *L. pneumophila* (91 genomes), *N. gonorrhoeae* (15  
106 genomes), *P. aeruginosa* (150 genomes) and *S. marcescens* (39 genomes). Only one strain from *P.*  
107 *aeruginosa* (KU, accession number CP014210.1) was discarded because of low assembly quality  
108 (32% of ambiguous positions). We built a ML core genome tree showing the phylogenetic  
109 relationships between the available assemblies for each species (S1 Fig). Based on this phylogenetic  
110 information and the strains commonly used in the literature, we selected 8 reference genomes for *K.*  
111 *pneumoniae*, 7 for *L. pneumophila*, 3 for *N. gonorrhoeae*, 6 for *P. aeruginosa* and 4 for *S. marcescens*  
112 (S1 Table), including the NCBI reference genome of each species. The strains 342 and AR\_0080 (*K.*  
113 *pneumoniae*), and U8W and Lansing 3 (two *L. pneumophila* strains not included in subsp.  
114 *pneumophila*), and PA7 (a known ‘taxonomic outlier’ of *P. aeruginosa*) showed ANI values <95% in  
115 pairwise comparisons with the remaining selected references (S3 Table) and long branches separating  
116 them from the other references in their corresponding phylogenies (S1 File).  
117 *In silico* MLST typing was performed for all the reference genomes except those of *S. marcescens*.  
118 The only cases of shared STs were found in strains HS09565, HS102438 and NTUH-K2044 of *K.*  
119 *pneumoniae* (ST 23), and in strains 32867 and CAV1761 of *N. gonorrhoeae* (ST 1901).

120

### 121 **Mapping to different references**

122 We randomly sampled 20 isolates from different whole-genome sequencing data sets of the five  
123 bacterial species. Next, filtered and trimmed paired-end reads of each isolate were mapped to each

124 reference genome from the same species. We computed different parameters for each mapping (S4  
125 Table). The proportion of mapped reads and coverage of the reference genome (i.e., the percentage of  
126 reference genome covered by the aligned reads) showed variability depending on the reference used  
127 for mapping (Figs 1 and 2). Both parameters followed a roughly similar trend, as they presumably  
128 depend on the genetic distance between isolates and reference genomes. Moreover, we observed  
129 overlaps between the values obtained from mappings of the same isolates against different reference  
130 sequences in the five species. In most cases, the lowest median values were obtained in the alignments  
131 against the most genetically distant reference genomes (see ‘Selected isolates and reference  
132 genomes’). However, the largest gap between median values depending on reference choice was  
133 found in the *S. marcescens* data set: the alignments to the outbreak-related reference UMH9 showed a  
134 high proportion of mapped reads (96.7%) and genome coverage (97.7%), whereas the alignment  
135 against the remaining references resulted in median values lower than 89% for both parameters. This  
136 was probably due to the high proportion of mapped reads and genome coverage resulting from  
137 mappings of outbreak isolates against a very close reference genome. Differences in both parameters  
138 were found to be significant (Kruskal-Wallis,  $P < 0.05$ ) depending on the reference used for mapping  
139 in all species but *N. gonorrhoeae*. In the case of genome coverage, most pairwise comparisons (50%-  
140 100% in the four species) were found to be significant (Wilcoxon,  $P < 0.05$ ), whereas the number of  
141 significant comparisons was lower for the proportion of mapped reads (Table 1). For example, in the  
142 case of *K. pneumoniae*, only 2 (out of 28) comparisons, involving the most genetically divergent  
143 reference genomes, showed significant differences in the proportion of mapped reads.

144

145 \*\*\* Place Fig 1. around here \*\*\*

146 \*\*\* Place Fig 2. around here \*\*\*

147

148 **Table 1. Proportion of significant ( $P < 0.05$ ) comparisons depending on reference choice.**

|  |  | Proportion (%) of significant comparisons |
|--|--|-------------------------------------------|
|  |  |                                           |

| Species               | Comparisons | Mapped reads <sup>a</sup> | Genome coverage <sup>a</sup> | SNPs <sup>a</sup> | $\rho^b$ | dN/dS <sup>a</sup> |
|-----------------------|-------------|---------------------------|------------------------------|-------------------|----------|--------------------|
| <i>K. pneumoniae</i>  | 28          | 7.1                       | 75.0                         | 53.6              | 42.9     | 60.7               |
| <i>L. pneumophila</i> | 21          | 19.0                      | 52.4                         | 95.2              | 23.8     | 47.6               |
| <i>N. gonorrhoeae</i> | 3           | 0.0                       | 0.0                          | 66.7              | 0.0      | 66.7               |
| <i>P. aeruginosa</i>  | 15          | 26.7                      | 93.3                         | 86.7              | 73.3     | 53.3               |
| <i>S. marcescens</i>  | 6           | 50.0                      | 100                          | 83.3              | 83.3     | 83.3               |

149 <sup>a</sup> Pairwise Bonferroni-corrected Wilcoxon tests.

150 <sup>b</sup> Pairwise Kolmogorov-Smirnov tests.

151

152 The average coverage depth (i.e., mean number of reads covering each position of the reference  
153 genome) was only slightly affected by reference choice (Fig 3, S4 Table). Its effect was noticeable  
154 when reads were mapped to the most divergent reference genomes of the different species, as in the  
155 previous parameters. However, the average depth seemed to be more dependent on other factors such  
156 as the total number of reads (sequencing coverage) of the isolates rather than on the genetic distance  
157 to the reference genome. One such example is isolate NG-VH-50 (*N. gonorrhoeae*), which had a low  
158 total number of reads and also showed low average depth values regardless the reference selected for  
159 mapping (S5 Table). Differences in this parameter depending on the reference used for mapping were  
160 found to be non-significant in all the species, according to Kruskal-Wallis tests.

161

162 **\*\*\* Place Fig 3. around here \*\*\***

163

### 164 **SNP calling**

165 SNPs were called and quality-filtered from the different mappings to each reference of the five  
166 species. The number of quality SNPs showed high variability depending on the reference used.

167 Overlapping ranges of the number of called SNPs were found when comparing the results of the same  
168 isolates aligned to different reference sequences (Fig 4). Thus, considering that the number of SNPs  
169 between sequences is directly related to their genetic distance, SNP-calling results reflect genetic  
170 heterogeneity among isolates selected from the same species, as individual isolates showed different  
171 genetic relatedness to the different references.

172

173 **\*\*\* Place Fig 4. around here \*\*\***

174

175 An overall inverse relationship between SNP count and the previously discussed alignment  
176 parameters (mapped reads and genome coverage) was also observed (see Figs 1, 2 and 4). This  
177 implies that, in most cases, more SNP calls were expected in alignments with a lower proportion of  
178 mapped reads and genome coverage (which is roughly indicative of a worse performance of the read  
179 mapping process).

180 A relationship between the genetic distance of isolates to the reference sequence and the total number  
181 of SNPs called was clearly observed in the alignments against the most distant reference genomes of  
182 *K. pneumoniae*, *L. pneumoniae* and *P. aeruginosa*. These sequences, whose distances to all the  
183 isolates were expected to be high, showed SNP counts one order of magnitude larger than to other  
184 reference sequences (S4 Table).

185 In the case of *S. marcescens*, the alignments to strain UMH9 resulted in significantly fewer SNP calls  
186 when compared to mappings against the remaining reference sequences. This is explained by the  
187 presence of nearly identical isolates (outbreak isolates) to strain UMH9 (<160 SNPs detected). A  
188 similar case was found in *L. pneumophila* isolates 28HGV and 91HGV, which appeared to be nearly  
189 identical to the reference strain Paris, as less than 100 SNPs were detected in their respective  
190 mappings to this sequence. In all the species, most comparisons (53%-95%) between called SNPs  
191 from mappings against different references were significant (Wilcoxon,  $P < 0.05$ ) (Table 1).

192

193 **Phylogenetic analyses and tree comparisons**



194 We obtained a collection of MSAs including the same isolates and reference sequences, but differing  
195 only in the reference used for mapping by removing the regions absent in each mapping reference. We  
196 also obtained a ‘core’ genome MSA by removing simultaneously all the regions absent from any of  
197 the reference genomes for each species. Then, ML trees were inferred from each MSA. Due to  
198 methodology used to obtain the MSAs, the comparison between phylogenies strictly implies assessing  
199 the impact of reference selection.

200 Firstly, we quantified the topological distances between phylogenetic trees from each species with  
201 Robinson-Foulds clusters (RF) and matching clusters (MC) metrics. Tree distances spanned a variable  
202 range of values depending on the species (Table 2, S6 Table). The normalized values of both metrics  
203 for the same tree comparisons were not equal (in most cases) but followed a similar global trend (Fig  
204 5).

205

206 \*\*\* Place Fig 5. around here \*\*\*

207

208

209 **Table 2. Descriptive statistics of topological distances per species.**

| Species               | Matching clusters |        |      |     |     | Robinson-Foulds clusters |        |     |     |     |
|-----------------------|-------------------|--------|------|-----|-----|--------------------------|--------|-----|-----|-----|
|                       | Mean              | Median | SD   | Min | Max | Mean                     | Median | SD  | Min | Max |
| <i>K. pneumoniae</i>  | 57.7              | 49     | 34.4 | 0   | 99  | 12.4                     | 11     | 6.2 | 0   | 20  |
| <i>L. pneumophila</i> | 43.9              | 42     | 16.0 | 5   | 67  | 9.7                      | 11     | 3.5 | 1   | 14  |
| <i>N. gonorrhoeae</i> | 40.0              | 44     | 13.5 | 25  | 51  | 8.7                      | 10     | 3.2 | 5   | 11  |
| <i>P. aeruginosa</i>  | 49.9              | 47     | 16.1 | 25  | 80  | 12.3                     | 12     | 4.2 | 7   | 19  |
| <i>S. marcescens</i>  | 31.3              | 29.5   | 7.9  | 21  | 43  | 6.5                      | 6.5    | 2.9 | 3   | 10  |

210

211

212 The comparisons involving phylogenies that include sequences mapped to the most divergent  
213 reference genomes of *K. pneumoniae* and *P. aeruginosa* showed the largest distance values. However,  
214 in most cases there was not a straightforward relationship between the genetic distance to the  
215 reference genomes and the topological distance between the corresponding trees (Fig 6). For example,  
216 *K. pneumoniae* trees using sequences from mappings to strains 342 and AR\_0080 showed an identical  
217 topology (RF=0, MC=0), despite the ANI value between these references was <94%.

218

219 **\*\*\* Place Fig 6. around here \*\*\***

220

221 The congruence between different tree topologies was rejected in most comparisons by ELW tests  
222 (Table 3). The few cases in which congruence was not rejected could be explained by the close  
223 phylogenetic relationship between the reference genomes involved.

224

225 **Table 3. Congruent comparisons according to ELW test. All the other pairwise comparisons**  
226 **were not congruent.**

| Species               | Reference  | Congruent pair       |
|-----------------------|------------|----------------------|
| <i>K. pneumoniae</i>  | HS09565    | HS09565, NTUH-K2044  |
|                       | HS102438   | HS102438, NTUH-K2044 |
|                       | NTUH-K2044 | NTUH-K2044, HS09565  |
|                       | 342        | 342, AR_0080         |
|                       | AR_0080    | AR_0080, 342         |
| <i>L. pneumophila</i> | Lansing 3  | Lansing 3, U8W       |

227

228 Finally, in order to assess in detail the effects of reference selection on phylogenetic inference, trees  
229 from the same species were compared qualitatively. Changes in the phylogenetic relationships were

230 found when using different reference sequences in almost all cases except for two identical  
231 topologies. In some cases, the changes only affected branches in clades including closely related  
232 isolates (Fig 7A and 7B), while others implied more profound changes in the resulting topologies.  
233 Moreover, the alignments against a single reference genome seemed to underestimate the genetic  
234 distance between the consensus sequences of the isolates and the reference sequence. Branch lengths  
235 were thus shortened between the leaves involved. In some extreme cases (when mapping to  
236 genetically distant genomes 342, AR\_0080 [*K. pneumoniae*], Lansing 3, U8W [*L. pneumophila*] and  
237 PA7 [*P. aeruginosa*]), this ‘attraction’ effect led to the clustering of reference genomes not used as  
238 references for mapping in a single clade, regardless their genetic distance to the isolates (Fig 7D).  
239 These differences were also observed when only the core genome was used to obtain the phylogenetic  
240 tree (S3 File). Additional species-specific differences are described next.

241

242 **\*\*\* Place Fig 7. around here \*\*\*\***

243

244 *K. pneumoniae*. The topologies inferred with KP1768, NTUH-K2044, HS09565 and HS102438 as  
245 reference sequences revealed the same phylogenetic relationships between clusters of isolates,  
246 although there were some differences within clusters depending on the reference used for the MSA.  
247 Isolates HGV2C-06 and HCV1-10 (not associated to any of these clusters) changed their placement in  
248 the topologies with HS11286 and AR\_0143 as reference sequences (Fig 8). The tree topologies using  
249 342 and AR\_0080 as reference genomes were identical and markedly different to the phylogenies  
250 derived with the other reference strains (S2 File).

251

252 **\*\* Place Fig 8. around here \*\*\***

253

254 *L. pneumophila*. The tree topologies using Lansing 3 and U8W as reference genomes were the most  
255 similar ones for this species (RF=1, MC=5) despite the large genetic distance between these  
256 sequences (ANI < 94%). Their topology was markedly different from the remaining topologies, where  
257 isolates grouped in three clades associated with reference genomes Paris, Alcoy and Philadelphia 1,

258 respectively (see Fig 7, S2 File). Notably, because of the epidemiological implications discussed  
259 below, isolates 28HGV and 91HGV were included in the Alcoy clade only when mapped to this  
260 reference genome (Fig 7C), whereas in all other cases (excluding U8W and Lansing 3) the isolates  
261 grouped with the Paris strain.

262

263 *N. gonorrhoeae*. The most similar topologies resulted from using FA 1090 and 32867 as reference  
264 genomes, despite that 32867 and NCTC13798 had larger ANI values. Three clades of isolates could  
265 be identified in all the phylogenies. However, those isolates not included in any of these clusters  
266 changed their position in the tree when using NCTC13798 as reference sequence in comparison with  
267 the two other trees. As an exception, isolate NG-VH-50 always grouped close to the reference  
268 sequence it was mapped to (S2 File). This artifact was due to the low total number of reads obtained  
269 in sequencing this strain.

270

271 *P. aeruginosa*. Three clades were clearly identified in all the trees, with the exception of the one  
272 inferred using PA7 as reference sequence. In this tree, PA7 was placed in a cluster of isolates,  
273 whereas the remaining reference sequences clustered together (S2 File). The main topological  
274 differences depending on the reference were: (a) the placement of reference genome M18 and the  
275 isolate P5M1 in the tree, and (b) the phylogenetic relationships within the clade of reference genomes  
276 and P6M6, where the sequence chosen as reference for mapping occupied a basal position in the clade  
277 (Fig 9).

278

279 \*\*\* Place Fig 9. around here \*\*\*\*

280

281 *S. marcescens*. Outbreak isolates grouped with strain UMH9 in all the trees. Branch lengths within  
282 this clade were practically null when UMH9 was used as the reference sequence, but these lengths  
283 increased when other reference sequences were used (Fig 10). As expected, the control isolate  
284 SMEIx20 grouped with its closest reference (Db11) in all the cases. The phylogenetic relationships  
285 between reference genomes, isolates and clades changed depending on the reference used. The

286 reference genome WW4 grouped with isolate CNH62 in all the topologies except when this strain was  
287 used as reference (S2 File).

288

289 **\*\*\* Place Fig 10. around here \*\*\***

290

### 291 **Distribution of recombination rates**

292 Population recombination rates ( $\rho$ ) were computed for 1000 bp sliding windows of the MSAs (S4  
293 Table) and the corresponding distributions were compared. Those regions that were not present in all  
294 the sequences of a species were removed from the alignments for these analyses.

295 Overall, the distributions of recombination rates were very similar regardless the reference genome  
296 used in each case. However, relevant differences in some peaks were found in different MSAs from  
297 the same species. For example, the MSAs built with 32867 or NCTC13798 (*N. gonorrhoeae*) as  
298 reference sequences showed at least two clearly observable peaks that were absent when FA 1090 was  
299 the reference (Fig 11).

300

301 **\*\*\* Place Fig 11. around here \*\*\***

302

303 The number of significant pairwise comparisons between distributions of recombination rates  
304 (Kolmogorov-Smirnov,  $P < 0.05$ ) differed widely depending on the species. While none of the  
305 comparisons between distributions of *N. gonorrhoeae* sequences showed significant results (although,  
306 as described previously, relevant differences were found), almost all *S. marcescens* estimated  
307 distributions were found to be significantly different (83.3%) (Table 1). In most cases, the  
308 significance of the comparisons between recombination rates could be explained by the phylogenetic  
309 relationships among the reference genomes. For example, the comparisons involving the most distant  
310 reference sequences of *K. pneumoniae*, *L. pneumophila* and *P. aeruginosa* showed significant  
311 differences, with the exception of the mutual comparisons between U8W and Lansing 3 (*L.*  
312 *pneumophila*), as well as AR\_0080 and 342 (*K. pneumoniae*). Moreover, the significant comparisons

313 in *P. aeruginosa* roughly reflected genetic distances between reference sequences, because using  
314 phylogenetically close reference sequences (M18 and PAO1 or UCBPP-PA14, Pa124 and 12939)  
315 resulted in non-significant differences between recombination rate distributions. In the case of *S.*  
316 *marcescens*, generalized significant comparisons could reflect nearly homogeneous divergence among  
317 the four reference genomes (S1 File).

318

### 319 **Analysis of natural selection**

320 Changes in the ratio  $\omega$  ( $= dN/dS$ ) due to reference choice could affect inferences on how natural  
321 selection has acted throughout the genome. This parameter was estimated in pairwise comparisons  
322 between concatenated CDS extracted from consensus sequences obtained from the mappings (S4  
323 Table).

324 In all cases, the  $dN/dS$  values computed for each gene were  $<1$ . Differences in  $dN/dS$  depending on the  
325 reference used (Fig 12) were significant (Kruskal-Wallis,  $P < 0.05$ ) for all the species. The proportion  
326 of significant pairwise comparisons (Wilcoxon,  $P < 0.05$ ) depended on the species, ranging from  
327 47.7% (*L. pneumophila*) to 83.3% (*S. marcescens*) (Table 1). In contrast with the results obtained in  
328 the parameters discussed previously, some of the comparisons involving the most genetically distant  
329 reference genomes (e.g., 342 strain of *K. pneumoniae*) as mapping references were not significant.  
330 Therefore, in this case it is difficult to explain the variability of  $\omega$  based on the genetic distances  
331 between reference sequences for most species. *N. gonorrhoeae* could be treated as an exception,  
332 because the comparisons involving the reference strain FA 1090 (the most genetically distinct one)  
333 were the only significant ones. These differences were also observed when only the core genome was  
334 used to compute  $\omega$ .

335

336 \*\*\* Place Fig 12. around here \*\*\*

337

### 338 **Discussion**

339 The impact of using different reference sequences for mapping NGS data sets has been studied

340 previously in clinically relevant bacteria such as *Escherichia coli* [22], *Salmonella enterica* [26],  
341 *Listeria monocytogenes* [23,24,28,42] or *Mycobacterium tuberculosis* [25,28], as well as in  
342 eukaryotes [21,43,44], including *Homo sapiens* [45]. However, a systematic analysis of the  
343 evolutionary and epidemiological implications of reference choice, encompassing different bacterial  
344 species and diverse reference genomes is still missing. This work has been aimed at filling this gap.  
345 Indeed, in some cases, reference selection analysis is incidental, spanning a restricted number of  
346 reference sequences [46]. Among the species included in this work, the influence of reference  
347 diversity on SNP calling has been previously assessed in *K. pneumoniae* and *N. gonorrhoeae* [28],  
348 whereas *L. pneumophila*, *P. aeruginosa* (both showing high genomic variability [33,35]) and *S.*  
349 *marcescens* have not been studied under this perspective.

350

351 Statistics on raw mapping data such as the proportion of mapped reads and the coverage of the  
352 reference genome can provide preliminary information on the effect of reference choice and its effects  
353 on subsequent analyses, because these parameters reflect the performance of read alignment. As  
354 suggested previously, the genetic distance between short-read data and the reference genome is  
355 directly related to incorrect read alignment and unmapped reads due to mismatches between the  
356 sequence of the reads and the homologous positions in the reference [19,20,22]. This is also  
357 confirmed by our results on read alignment statistics. The percentage of the reference genome covered  
358 by mapped reads may be affected not only by genetic differences in homologous regions, but also by  
359 the presence of strain-specific genomic regions [21], because genes absent in the reference genome  
360 are expected to be lost during the mapping and in the subsequent multiple alignment. Moreover, as  
361 proposed by Lee and Behr [25], there might exist a coverage threshold beyond which subsequent  
362 phylogenetic analyses would be strongly affected, thus reducing the accuracy of evolutionary and  
363 epidemiological inferences derived from such inaccurate mappings.

364 The effect of sequencing coverage of the isolates on mapping seems to be generally independent of  
365 reference choice, as shown by the values of average coverage depth obtained in this study. Similarly  
366 to Pightling *et al.* [23], we have not observed any relationship between sequencing coverage and other  
367 variables during HTS data processing. However, as shown by one *N. gonorrhoeae* isolate (NG-VH-

368 50), the reference mapping approach could strongly underestimate the genetic distance between the  
369 assembly of the genome of a particular isolate and that of the reference genome below a certain  
370 threshold of total reads, thus affecting subsequent phylogenetic inferences.  
371  
372 Benchmarking of SNP calling performance for HTS data seems to be more common compared to  
373 other steps of genomic analyses [27,47–54]. Although most of these works are focused on assessing  
374 the effect of the selected pipeline (and its underlying algorithm), the use of different reference  
375 sequences has also been identified as a potential source of biases that could interact with other  
376 variables of the pipeline such as selection of the variant caller and read alignment software [23,24,28].  
377 The number of SNPs is often used as a criterion for defining clusters of epidemiologically related  
378 isolates [55]. Our results confirm the existence of a systematic and significant influence of reference  
379 choice on the number of identified SNPs in all the species analyzed. They also reflect the correlation  
380 between genetic distance of isolates to the reference genome and the number of called variants which,  
381 as highlighted in previous studies, could be associated with the increase of false positives when the  
382 precision of SNP calling decreases [23,28,42]. Overlapping ranges in the number of SNPs called  
383 depending on the reference sequence used for mapping reflects the genomic heterogeneity within the  
384 sets of isolates selected from each species.  
385  
386 Recovering phylogenetic relationships between organisms or strains within a species represents an  
387 essential procedure in evolutionary and epidemiological studies. Biases in how and how many SNPs  
388 are called as well as in the gene content of the final assemblies due to reference choice could affect  
389 phylogenetic inferences [47]. The overall negative results obtained in congruence tests also reflect the  
390 existence of a systematic effect of reference choice on tree topologies: the only statistically  
391 concordant comparisons (6 out of 73) between topologies of the same species were found when  
392 references chosen for mapping were (a) closely related sequences (*K. pneumoniae* ST 23 strains), or  
393 (b) extremely distant sequences, showing ANI values close to the boundaries for species delimitation.  
394 The topologies resulting from using phylogenetically unrelated, extremely divergent genomes were  
395 mutually similar while, in contrast, generally showed high topological distance values when compared



396 to trees built using non-extreme references. This kind of loss in tree resolution has already been  
397 observed (although limited to clonal bacteria [25]). In our case, it may be originated from a reduced  
398 proportion of shared gene content between isolates and extremely divergent sequences, along with the  
399 existence of barriers to recombination between populations, as the ability for recombination and its  
400 frequency is expected to decrease with genetic distance [56]. However, these differences were also  
401 observed when considering only the core genome. This suggests that the effect of the reference on  
402 phylogenetic inference is not only due to the presence/absence of genes in the accessory genome. It  
403 might be due also to differences in core genome sequences arising from biased/erroneous  
404 identification of variants.

405

406 The effect of reference choice on phylogenetic inferences is pervasive in these five species. However,  
407 despite the differences between topologies and even lack of congruence, these changes might not be  
408 necessarily associated with altered epidemiological inferences. A similar situation was studied by  
409 Usongo *et al.* [26] on a *S. enterica* epidemiological data set, in which two different topologies  
410 (RF=24) were resolute enough to distinguish different outbreak clusters. However, we have  
411 observed that the use of different reference sequences affects phylogenetic relationships between  
412 clades and even to the association of specific isolates to transmission clusters, thus potentially  
413 affecting epidemiological inferences. This has been observed even when using phylogenetically  
414 related strains from the same non-clonal species as a reference, in contrast with previous studies in  
415 clonal bacteria [25] where differences in phylogenetic inference appeared when using reference  
416 genomes from close but different species. This is most obvious in the *L. pneumophila* data set, in  
417 which two isolates changed their positions and were placed in the same cluster of the reference  
418 sequence used for mapping, while the overall topology remained practically unchanged.

419

420 Differences between trees were quantified by topological distance metrics, reflecting, in most cases,  
421 lack of correlation between tree distances and genetic distances of the corresponding reference  
422 genomes. As suggested previously [22,27], when working with a genetically diverse set of isolates, it  
423 is impossible to select a single reference close to all of them, and single-reference mapping biases are

424 expected to increase with genomic divergence. Therefore, these differences in tree topologies could be  
425 partially explained by the use of genetically heterogeneous data sets. Moreover, its impact on tree  
426 reconstruction may be alleviated by using multiple references or a reference pangenome instead  
427 [22,57–60]. If data sets of isolates were homogenous (i.e., the isolates are equally close to the same  
428 reference) as the one employed by Lee and Behr [25], we would expect that read alignment  
429 performance and tree resolution would decrease as we select progressively distant reference genomes  
430 [23,24,28].

431 However, we could not ignore that the presence of recombination (particularly in highly  
432 recombinogenic species such as *K. pneumoniae* and *L. pneumophila*) could reduce accuracy in  
433 phylogenetic reconstruction [22], thus explaining to some extent the topological incongruence or the  
434 differences in branch lengths [61].

435 Selecting one reference or another for mapping can also affect the estimates of phylogenetic distance  
436 between isolates [22,26], which is reflected in the branch lengths of the trees. This is clearly  
437 illustrated by the phylogenetic analysis of the *S. marcescens* data set, which reveals that tree branches  
438 connecting outbreak isolates increased their lengths when consensus sequences were calculated from  
439 alignments using reference genomes that were phylogenetically unrelated to the isolates (different  
440 from strain UMH9). Similar findings were observed for *Listeria monocytogenes* sequences by  
441 Pightling *et al.* [23].

442

443 The development and increasing availability of high-throughput, whole-genome sequencing  
444 technologies have allowed assessing evolutionary rates and dynamics at the genome level which, in  
445 turn, contribute to a better understanding of emerging diseases and transmission patterns [62].  
446 Therefore, the study of natural selection and recombination, frequent processes in bacteria [63], is  
447 relevant not only from an evolutionary point of view but also in its application to molecular  
448 epidemiology [64]. The impact of reference selection on the inference of evolutionary parameters  
449 such as substitution and recombination rates at the genome level has not been explored thoroughly  
450 previously. In this work, variations in  $dN/dS$  and  $\rho$  have been detected in all the species depending on  
451 the reference sequence used for mapping. This might have an effect in subsequent inferences on the

452 action of natural selection and the detection of recombination events. Significant differences in  $\rho$   
453 seemed to be more strongly correlated with the genetic distance between the genomes used as  
454 reference for mapping than  $dN/dS$ .  
455  
456 Short-read mapping of HTS data against a reference genome is a common approach in bacterial  
457 genomics. Our results show that the impact of selecting a single reference is pervasive in the genomic  
458 analyses of five different bacterial species, and likely in many others. All the parameters evaluated  
459 were affected by the usage of different reference sequences for mapping and, notably, alterations in  
460 phylogenetic trees modified in some cases the epidemiological inferences. Furthermore, working with  
461 heterogeneous sets of isolates seems to be a particularly challenging scenario for the selection of a  
462 single reference genome. Mapping simultaneously to multiple references or against a reference  
463 pangenome may reduce the effect of reference choice. In any case, exploring the effects of different  
464 references on the final conclusions is highly recommended.

465

## 466 **Methods**

467 The workflow used in this study is summarized in Fig 13.

468

469 **\*\*\* Place Fig 13. around here \*\*\***

470

471 For each species, we selected different (3-8) publicly available closed whole-genome sequences as  
472 references and 20 sets of short-reads from whole-genome sequencing projects. Reads were mapped to  
473 each selected reference genome per species and consensus sequences were obtained from quality  
474 SNPs of each mapping. Consensus sequences from the mappings to the same reference genome were  
475 added to the MSA of all references of each species. For the analysis of each MSA, (a) we considered  
476 only those genome regions present in the reference used for mapping and (b) we obtained a ‘core’  
477 MSA by removing all the regions absent from any of the reference sequences. Finally, we studied the  
478 impact of reference choice on the ML trees inferred from each MSA, recombination rates calculated

479 on ‘core’ MSAs and dN/dS ratios calculated considering only coding sequences.

480

### 481 **Selection of reference genomes**

482 Closed whole-genome sequences of *K. pneumoniae*, *L. pneumophila*, *N. gonorrhoeae*, *P. aeruginosa*

483 and *S. marcescens* available in June, 2018 were downloaded from NCBI GenBank [65] in fasta

484 format. Plasmids were removed with seqtk v1.0 (<https://github.com/lh3/seqtk>) (subseq command).

485 Genome sequences were annotated using Prokka v1.12 [66] (with default settings) and the set of intra-

486 species co-orthologous genes was inferred using Proteinortho v5.11 [67] (option -p=blastn+). Coding

487 sequences (CDS) of orthologous genes in each species were aligned with MAFFT v7.402 [68] (with

488 default settings) and concatenated to obtain a CDS-coding core genome multiple sequence alignment

489 (MSA) for each species.

490 A maximum-likelihood (ML) tree was inferred from each MSA with IQ-TREE v1.6.6 [69] using the

491 GTR substitution model and 1000 fast bootstrap replicates [70]. After consideration of the core

492 genome phylogenies (distance between strains and clusters) and the usage of different references in

493 the literature, we selected a set of genomes to be employed as reference genomes for each species.

494 The number of reference sequences selected was roughly proportional ( $\approx 10\%$ ) to the initial number of

495 publicly available sequences from each species. In brief, we included (a) the NCBI reference genome

496 of the species, (b) relevant or commonly used references for mapping, and (c) representative

497 sequences of different lineages. Detailed information about the selected reference genomes is

498 provided in S1 Table.

499 The selected reference genomes of each species were aligned with progressiveMauve v2.4 [71] and

500 gaps were added to regions where homologous sequences were absent in any genome in the alignment

501 (see ‘Code availability’). The XMFA output alignment was converted into fasta format with

502 `xmfa2fasta.pl` ([https://github.com/kjolley/seq\\_scripts/blob/master/xmfa2fasta.pl](https://github.com/kjolley/seq_scripts/blob/master/xmfa2fasta.pl)).

503 To evaluate the genetic divergence between the selected reference sequences, we used three different

504 procedures: (a) we built ML trees with IQ-TREE, as above, (b) we computed Average Nucleotide

505 Identities [72] (ANIs) using FastANI v1.1 [73], and (c) we performed an *in silico* multi-locus

506 sequence typing (MLST) using mlst v1.15.1 (<https://github.com/tseemann/mlst>) for *K. pneumoniae*,  
507 *N. gonorrhoeae* and *P. aeruginosa*; and using BLAST+ [74] and the EWGLI [75] database for *L.*  
508 *pneumophila*. This procedure was not used with *S. marcescens*.

509

### 510 **Selection of isolates for analysis**

511 20 sets of short-reads from whole genome sequencing projects of the five species (S2 Table) were  
512 randomly selected (with the R [76] function `sample_n`) among those obtained in our laboratory and/or  
513 deposited at the SRA as detailed next. Sequences in our laboratory were obtained with Illumina  
514 MiSeq 300x2 paired-ends (*P. aeruginosa*) or NextSeq 150x2 paired-ends (the remaining species). The  
515 *K. pneumoniae* data set included isolates of 9 different STs obtained in a surveillance study of ESBL-  
516 producing strains in the Comunitat Valenciana (Spain). The *L. pneumophila* data set comprised  
517 isolates obtained from environmental surveillance at 2 hospitals of the Comunitat Valenciana. The *N.*  
518 *gonorrhoeae* data set includes isolates obtained in a surveillance study in different regions of Spain  
519 (Comunitat Valenciana, Madrid and Barcelona). The *P. aeruginosa* data set included isolates from 2  
520 outbreaks detected in the Comunitat Valenciana. Finally, the *S. marcescens* data set included 9 almost  
521 identical outbreak isolates genetically close to strain UMH9, one isolate close to the reference of the  
522 species, Db11, and 10 unrelated isolates downloaded from the SRA repository.

523

### 524 **Quality control analysis and sequence read processing**

525 The quality of the reads (before and after trimming and filtering) was assessed using FastQC v0.11.8  
526 (<https://www.bioinformatics.babraham.ac.uk/projects/fastqc/>) and quality reports were merged with  
527 MultiQC v1.7 [77]. Illumina, Truseq and Nextera adapters were removed with cutadapt v1.18 [78].  
528 Reads were trimmed and filtered using Prinseq-lite v0.20.4 [79]. 3'-end read positions with quality  
529 <20 were trimmed and reads with overall quality <20, >10% ambiguity content and total length <50  
530 bp were removed.

531

### 532 **Mapping, variant calling and consensus sequences**

533 Reads passing the above filters were mapped to each selected reference of each species using BWA  
534 MEM v0.7.17 [80] (with default settings). SAM files were converted to binary format (BAM), sorted  
535 and indexed with samtools v1.6 [81] (commands sort and index). Mapping statistics were obtained  
536 using samtools (commands flagstats and depth).  
537 SNPs were identified in each alignment with samtools and bcftools v1.6 [82] (commands mpileup and  
538 call, respectively). Indels were excluded from the analysis (option --skip-variants indels). Remaining  
539 SNPs after filtering (quality >40, mapping quality [MQ] >30, depth >10 and under twice the average  
540 depth and distance of >10 pb to any indel) were counted with bcftools (command stats).  
541 Consensus sequences were obtained from quality-filtered SNPs and the appropriate reference  
542 sequence using bcftools (command consensus) for every possible combination of isolates and  
543 reference genomes from the same species.

544

#### 545 **Multiple sequence alignment of reference genomes and consensus sequences**

546 The MSAs of the reference sequences from each species were used as ‘backbones’ on which the  
547 consensus sequences from the mappings to the same reference genome were added using a custom  
548 Python script (see ‘Code availability’). XMFA-formatted MSAs were converted to fasta format as  
549 described previously. Finally, for the analysis of each MSA we considered only those genome regions  
550 present in the reference genome, using a custom Python script (see ‘Code availability’) to mask the  
551 absent regions from the global MSA. This procedure (see Fig 13) allowed us to obtain a collection of  
552 MSAs (one per each reference sequence) including the same isolates and reference genomes (per  
553 species), differing only in the reference sequence used for mapping. In addition, we also obtained a  
554 ‘core’ genome MSA by removing all the regions absent from any of the reference sequences.

555

#### 556 **Analysis of natural selection**

557 We explored the effect of reference choice on the inference of natural selection at the whole genome  
558 level by computing pairwise  $dN/dS$  ratios with the PAML package 4.9i [83] between concatenated  
559 CDSs of consensus sequences that were built using the same reference. CDSs were extracted using

560 coordinates of the corresponding reference obtained with Prokka (see ‘Selection of reference  
561 genomes’). A custom Python script (see ‘Code availability’) and the emboss package v6.6.0 [84] were  
562 used. We also computed pairwise dN/dS values between consensus sequences considering only the  
563 core genome CDSs (i.e., shared by all the selected references from each species).

564

### 565 **Distribution of recombination rates**

566 Population recombination rates ( $\rho = 4N_e r$ ; where  $N_e$  is the effective population size and  $r$  is the  
567 recombination rate per base pair and generation) were estimated using LDJump [85] (with a window  
568 of 1000 pb) from the ‘core’ genome MSAs. The distributions of recombination rates along MSAs  
569 were compared for the different reference genomes of each species and were represented graphically  
570 with the R package ggplot2 [86].

571

### 572 **Comparisons of phylogenetic trees**

573 ML trees were inferred from each MSA with IQ-TREE as described above, and visualized with iTOL  
574 v4 [87].

575

576 **Congruence tests.** We used expected likelihood weight (ELW) tests [88], as implemented in IQ-  
577 TREE, to assess the congruence between phylogenies that differed only in the genome chosen as  
578 mapping reference. The ELW test computes weights for each topology based on its likelihood given a  
579 MSA, with the total sum of weights being equal to 1 and higher weights assumed to be those best  
580 supported by the data. Decreasing weights are progressively collected to build a confidence set until  
581 their cumulative sum is equal to or higher than 0.95. At this point, the trees included in the confidence  
582 set are accepted as congruent.

583

584 **Topological distances.** Pairwise distances between tree topologies obtained with the different  
585 mapping references were assessed using TreeCmp v2.0 [89]. Robinson-Foulds [90] clusters (RF) and  
586 matching clusters [89] (MC) metrics were calculated for each comparison. The RF distance reflects

587 the number of bipartitions differing between topologies, whereas the MC distance computes the  
588 minimal number of moves needed to convert a topology into another. Therefore, two identical  
589 topologies will receive a value equal to 0 with both metrics. Conversely, distance values will increase  
590 as the compared trees become more different.

591

592 **Qualitative comparison of trees.** Finally, a qualitative assessment of trees was performed in order to  
593 identify specific changes in the phylogenetic relationships between isolates due to the choice of  
594 different reference genomes. Particularly, we focused on clustering of isolates and alterations that  
595 could affect epidemiological inferences (e.g., including/excluding one particular sample in an  
596 outbreak).

597

### 598 **Statistical analyses**

599 To study the effect of using different reference genomes on mapping statistics (proportion of mapped  
600 reads, genome coverage, average depth), number of called SNPs, and dN/dS values, non-parametric  
601 Kruskal-Wallis [91] tests were performed with R 3.5 (function `kruskal.test`). If a Kruskal-Wallis test  
602 showed significant differences between groups (reference sequence), we performed pairwise  
603 Wilcoxon [92] tests with Bonferroni-corrected p-value for multiple comparisons (with the R function  
604 `pairwise.wilcox.test`) in order to identify significant differences between specific reference sequences.  
605 Pairwise Kolmogorov-Smirnov [93] tests (R function `pairwise_ks_test`  
606 [<https://github.com/netlify/NetlifyDS>]), which compare observed distributions of data, were  
607 performed in order to identify significant differences in the distributions of recombination rates  
608 depending on the mapping reference.

609

### 610 **Code availability**

611 Custom scripts used in this work are available in <https://github.com/cvmullor/reference>.

612

### 613 **Supporting information**



614 **S1 Fig. Core genome trees of the complete whole-genome sequences downloaded from**  
615 **GenBank.** The circles at the tips denote the sequence type (ST) of the different strains in the trees of  
616 the species with an MLST scheme available for *in-silico* typing. The black triangles denote the  
617 branches with bootstrap support values <70. (A) *K. pneumoniae*, (B) *L. pneumophila* and (C) *P.*  
618 *aeruginosa* trees were rooted on their corresponding longest branches. As all the branches connecting  
619 the different clades of (D) *S. marcescens* and (E) *N. gonorrhoeae* trees were approximately the equal  
620 length, they were rooted arbitrarily for a better visualization.

621 **S1 Table. Strains selected as references for mapping.**

622 **S2 Table. Isolates (short-read sequence data) selected for mapping.**

623 **S3 Table. ANI (%) calculated between the selected reference genomes.**

624 **S4 Table. Summary statistics per reference and species.** Median, minimum and maximum values  
625 are shown.

626 **S5 Table. Mapping and SNP statistics per reference and species.**

627 **S6 Table. RF and MC distances.**

628 **S1 File. Phylogenetic trees of the reference genomes selected for each species.**

629 **S2 File. Phylogenetic trees per reference and species.** Strain selected as reference for mapping in  
630 each tree is indicated in the corresponding newick file name.

631 **S3 File. ‘Core’ genome phylogenetic trees per reference and species.** Strain selected as reference  
632 for mapping in each tree is indicated in the corresponding newick file name.

633

## 634 **Funding**

635 This project was partly funded by projects BFU2017-89594R from MICIN (Spanish Government) and  
636 PROMETEO2016-0122 (Generalitat Valenciana, Spain). WGS was performed at Servicio de  
637 Secuenciación Masiva y Bioinformática de la Fundación para la Investigación Sanitaria y Biomédica  
638 de la Comunitat Valenciana (FISABIO) and co-financed by the European Union through the  
639 Operational Program of European Regional Development Fund (ERDF) of Valencia Region (Spain)  
640 2014-2020. CV is recipient of contract FPU2018/02579, BB of contract FPU2016/02139 and CF of

641 FPI contract BES-2015-074204 from MICIN (Spanish Government). LM benefits of a fellowship  
642 from Fundación Carolina. The sponsors had no role in study design, data collection and analysis,  
643 decision to publish, or preparation of the manuscript.

644

## 645 **References**

- 646 1. Brockhurst MA, Colegrave N, Rozen DE. Next-generation sequencing as a tool to study  
647 microbial evolution. *Mol Ecol*. 2011 Mar;20(5):972–80.
- 648 2. Quainoo S, Coolen JPM, van Hijum SAFT, Huynen MA, Melchers WJG, van Schaik W, et al.  
649 Whole-Genome Sequencing of Bacterial Pathogens: the Future of Nosocomial Outbreak  
650 Analysis. *Clin Microbiol Rev*. 2017 Oct;30(4):1015–63.
- 651 3. Bentley SD, Parkhill J. Genomic perspectives on the evolution and spread of bacterial pathogens.  
652 *Proc Biol Sci*. 2015 Dec 22;282(1821):20150488.
- 653 4. Harris SR, Feil EJ, Holden MTG, Quail MA, Nickerson EK, Chantratita N, et al. Evolution of  
654 MRSA during hospital transmission and intercontinental spread. *Science*. 2010 Jan  
655 22;327(5964):469–74.
- 656 5. Holt KE, Baker S, Weill F-X, Holmes EC, Kitchen A, Yu J, et al. *Shigella sonnei* genome  
657 sequencing and phylogenetic analysis indicate recent global dissemination from Europe. *Nat*  
658 *Genet*. 2012 Sep;44(9):1056–9.
- 659 6. Kaiser T, Finstermeier K, Häntzsch M, Faucheux S, Kaase M, Eckmanns T, et al. Stalking a  
660 lethal superbug by whole-genome sequencing and phylogenetics: Influence on unraveling a  
661 major hospital outbreak of carbapenem-resistant *Klebsiella pneumoniae*. *Am J Infect Control*.  
662 2018 Jan;46(1):54–9.
- 663 7. David S, Reuter S, Harris SR, Glasner C, Feltwell T, Argimon S, et al. Epidemic of carbapenem-  
664 resistant *Klebsiella pneumoniae* in Europe is driven by nosocomial spread. *Nat Microbiol*. 2019  
665 Nov;4(11):1919–29.
- 666 8. Laabei M, Recker M, Rudkin JK, Aldeljawi M, Gulay Z, Sloan TJ, et al. Predicting the virulence  
667 of MRSA from its genome sequence. *Genome Res*. 2014 May;24(5):839–49.
- 668 9. Golparian D, Donà V, Sánchez-Busó L, Foerster S, Harris S, Endimiani A, et al. Antimicrobial  
669 resistance prediction and phylogenetic analysis of *Neisseria gonorrhoeae* isolates using the  
670 Oxford Nanopore MinION sequencer. *Sci Rep*. 2018 Dec 4;8(1):17596.
- 671 10. Nikolayevskyy V, Niemann S, Anthony R, van Soolingen D, Tagliani E, Ködmön C, et al. Role  
672 and value of whole genome sequencing in studying tuberculosis transmission. *Clin Microbiol*  
673 *Infect*. 2019 Nov;25(11):1377–82.
- 674 11. Sánchez-Busó L, Harris SR. Using genomics to understand antimicrobial resistance and  
675 transmission in *Neisseria gonorrhoeae*. *Microb Genom* [Internet]. 2019 Feb;5(2). Available from:  
676 <http://dx.doi.org/10.1099/mgen.0.000239>
- 677 12. Harris SR, Clarke IN, Seth-Smith HMB, Solomon AW, Cutcliffe LT, Marsh P, et al. Whole-  
678 genome analysis of diverse *Chlamydia trachomatis* strains identifies phylogenetic relationships  
679 masked by current clinical typing. Vol. 44, *Nature Genetics*. 2012. p. 413–9.

- 680 13. Allard MW, Strain E, Melka D, Bunning K, Musser SM, Brown EW, et al. Practical Value of  
681 Food Pathogen Traceability through Building a Whole-Genome Sequencing Network and  
682 Database. Vol. 54, *Journal of Clinical Microbiology*. 2016. p. 1975–83.
- 683 14. Pérez-Losada M, Arenas M, Castro-Nallar E. Microbial sequence typing in the genomic era. Vol.  
684 63, *Infection, Genetics and Evolution*. 2018. p. 346–59.
- 685 15. McAdam PR, Templeton KE, Edwards GF, Holden MTG, Feil EJ, Aanensen DM, et al.  
686 Molecular tracing of the emergence, adaptation, and transmission of hospital-associated  
687 methicillin-resistant *Staphylococcus aureus* [Internet]. Vol. 109, *Proceedings of the National*  
688 *Academy of Sciences*. 2012. p. 9107–12.
- 689 16. Mentasti M, Cassier P, David S, Ginevra C, Gomez-Valero L, Underwood A, et al. Rapid  
690 detection and evolutionary analysis of *Legionella pneumophila* serogroup 1 sequence type 47.  
691 *Clin Microbiol Infect*. 2017 Apr;23(4):264.e1–264.e9.
- 692 17. Ellington MJ, Heinz E, Wailan AM, Dorman MJ, de Goffau M, Cain AK, et al. Contrasting  
693 patterns of longitudinal population dynamics and antimicrobial resistance mechanisms in two  
694 priority bacterial pathogens over 7 years in a single center. *Genome Biol*. 2019 Sep 2;20(1):184.
- 695 18. Alkan C, Sajjadian S, Eichler EE. Limitations of next-generation genome sequence assembly.  
696 *Nat Methods*. 2011 Jan;8(1):61–5.
- 697 19. Landan G, Graur D. Characterization of pairwise and multiple sequence alignment errors. Vol.  
698 441, *Gene*. 2009. p. 141–7.
- 699 20. Farrer RA, Henk DA, MacLean D, Studholme DJ, Fisher MC. Using false discovery rates to  
700 benchmark SNP-callers in next-generation sequencing projects. *Sci Rep*. 2013;3:1512.
- 701 21. Hurgobin B, Edwards D. SNP Discovery Using a Pangenome: Has the Single Reference  
702 Approach Become Obsolete? *Biology* [Internet]. 2017 Mar 11;6(1). Available from:  
703 <http://dx.doi.org/10.3390/biology6010021>
- 704 22. Bertels F, Silander OK, Pachkov M, Rainey PB, van Nimwegen E. Automated reconstruction of  
705 whole-genome phylogenies from short-sequence reads. *Mol Biol Evol*. 2014 May;31(5):1077–  
706 88.
- 707 23. Pightling AW, Petronella N, Pagotto F. Choice of reference sequence and assembler for  
708 alignment of *Listeria monocytogenes* short-read sequence data greatly influences rates of error in  
709 SNP analyses. *PLoS One*. 2014 Aug 21;9(8):e104579.
- 710 24. Pightling AW, Petronella N, Pagotto F. Choice of reference-guided sequence assembler and SNP  
711 caller for analysis of *Listeria monocytogenes* short-read sequence data greatly influences rates of  
712 error. *BMC Res Notes*. 2015 Dec 8;8:748.
- 713 25. Lee RS, Behr MA. Does Choice Matter? Reference-Based Alignment for Molecular  
714 Epidemiology of Tuberculosis. *J Clin Microbiol*. 2016 Jul;54(7):1891–5.
- 715 26. Usongo V, Berry C, Yousfi K, Doualla-Bell F, Labbé G, Johnson R, et al. Impact of the choice  
716 of reference genome on the ability of the core genome SNV methodology to distinguish strains  
717 of *Salmonella enterica* serovar Heidelberg. *PLoS One*. 2018 Feb 5;13(2):e0192233.
- 718 27. Carroll LM, Wiedmann M, Mukherjee M, Nicholas DC, Mingle LA, Dumas NB, et al.  
719 Characterization of Emetic and Diarrheal *Bacillus cereus* Strains From a 2016 Foodborne  
720 Outbreak Using Whole-Genome Sequencing: Addressing the Microbiological, Epidemiological,  
721 and Bioinformatic Challenges. Vol. 10, *Frontiers in Microbiology*. 2019.

- 722 28. Bush SJ, Foster D, Eyre DW, Clark EL, De Maio N, Shaw LP, et al. Genomic diversity affects  
723 the accuracy of bacterial single-nucleotide polymorphism-calling pipelines. *Gigascience*  
724 [Internet]. 2020 Feb 1;9(2). Available from: <http://dx.doi.org/10.1093/gigascience/giaa007>
- 725 29. Gil N, Fiser A. The choice of sequence homologs included in multiple sequence alignments has a  
726 dramatic impact on evolutionary conservation analysis. Vol. 35, *Bioinformatics*. 2019. p. 12–9.
- 727 30. Tettelin H, Riley D, Cattuto C, Medini D. Comparative genomics: the bacterial pan-genome.  
728 Vol. 11, *Current Opinion in Microbiology*. 2008. p. 472–7.
- 729 31. Dos Vultos T, Mestre O, Rauzier J, Golec M, Rastogi N, Rasolofo V, et al. Evolution and  
730 diversity of clonal bacteria: the paradigm of *Mycobacterium tuberculosis*. *PLoS One*. 2008 Feb  
731 6;3(2):e1538.
- 732 32. Lee RS, Proulx J-F, McIntosh F, Behr MA, Hanage WP. Previously undetected super-spreading  
733 of *Mycobacterium tuberculosis* revealed by deep sequencing [Internet]. Vol. 9, *eLife*. 2020.  
734 Available from: <http://dx.doi.org/10.7554/elife.53245>
- 735 33. Silby MW, Winstanley C, Godfrey SAC, Levy SB, Jackson RW. *Pseudomonas* genomes: diverse  
736 and adaptable. *FEMS Microbiol Rev*. 2011 Jul;35(4):652–80.
- 737 34. Hanage WP. Fuzzy species revisited. *BMC Biol*. 2013 Apr 15;11:41.
- 738 35. David S, Sánchez-Busó L, Harris SR, Martinen P, Rusniok C, Buchrieser C, et al. Dynamics and  
739 impact of homologous recombination on the evolution of *Legionella pneumophila* [Internet].  
740 Vol. 13, *PLOS Genetics*. 2017. p. e1006855. Available from:  
741 <http://dx.doi.org/10.1371/journal.pgen.1006855>
- 742 36. Koren S, Phillippy AM. One chromosome, one contig: complete microbial genomes from long-  
743 read sequencing and assembly. *Curr Opin Microbiol*. 2015 Feb;23:110–20.
- 744 37. Bryant JM, Grogono DM, Greaves D, Foweraker J, Roddick I, Inns T, et al. Whole-genome  
745 sequencing to identify transmission of *Mycobacterium abscessus* between patients with cystic  
746 fibrosis: a retrospective cohort study. *Lancet*. 2013 May 4;381(9877):1551–60.
- 747 38. Holt KE, Wertheim H, Zadoks RN, Baker S, Whitehouse CA, Dance D, et al. Genomic analysis  
748 of diversity, population structure, virulence, and antimicrobial resistance in *Klebsiella*  
749 *pneumoniae*, an urgent threat to public health. *Proc Natl Acad Sci U S A*. 2015 Jul  
750 7;112(27):E3574–81.
- 751 39. D’Auria G, Jiménez-Hernández N, Peris-Bondia F, Moya A, Latorre A. *Legionella pneumophila*  
752 pan-genome reveals strain-specific virulence factors. Vol. 11, *BMC Genomics*. 2010. p. 181.
- 753 40. Freschi L, Vincent AT, Jeukens J, Emond-Rheault J-G, Kukavica-Ibrulj I, Dupont M-J, et al. The  
754 *Pseudomonas aeruginosa* Pan-Genome Provides New Insights on Its Population Structure,  
755 Horizontal Gene Transfer, and Pathogenicity. *Genome Biol Evol*. 2019 Jan 1;11(1):109–20.
- 756 41. Abreo E, Altier N. Pangenome of *Serratia marcescens* strains from nosocomial and  
757 environmental origins reveals different populations and the links between them. *Sci Rep*. 2019  
758 Jan 10;9(1):46.
- 759 42. Kwong JC, Mercoulia K, Tomita T, Easton M, Li HY, Bulach DM, et al. Prospective Whole-  
760 Genome Sequencing Enhances National Surveillance of *Listeria monocytogenes*. *J Clin*  
761 *Microbiol*. 2016 Feb;54(2):333–42.
- 762 43. Gopalakrishnan S, Samaniego Castruita JA, Sinding M-HS, Kuderna LFK, Rääkkönen J,  
763 Petersen B, et al. The wolf reference genome sequence (*Canis lupus lupus*) and its implications

- 764 for *Canis* spp. population genomics [Internet]. Vol. 18, BMC Genomics. 2017. Available from:  
765 <http://dx.doi.org/10.1186/s12864-017-3883-3>
- 766 44. Wu X, Heffelfinger C, Zhao H, Dellaporta SL. Benchmarking variant identification tools for  
767 plant diversity discovery. BMC Genomics. 2019 Sep 9;20(1):701.
- 768 45. Yang X, Lee W-P, Ye K, Lee C. One reference genome is not enough [Internet]. Vol. 20,  
769 Genome Biology. 2019. Available from: <http://dx.doi.org/10.1186/s13059-019-1717-0>
- 770 46. Leekitcharoenphon P, Nielsen EM, Kaas RS, Lund O, Aarestrup FM. Evaluation of whole  
771 genome sequencing for outbreak detection of *Salmonella enterica*. PLoS One. 2014 Feb  
772 4;9(2):e87991.
- 773 47. Olson ND, Lund SP, Colman RE, Foster JT, Sahl JW, Schupp JM, et al. Best practices for  
774 evaluating single nucleotide variant calling methods for microbial genomics. Front Genet. 2015  
775 Jul 7;6:235.
- 776 48. Nielsen R, Paul JS, Albrechtsen A, Song YS. Genotype and SNP calling from next-generation  
777 sequencing data. Vol. 12, Nature Reviews Genetics. 2011. p. 443–51.
- 778 49. Petkau A, Mabon P, Sieffert C, Knox NC, Cabral J, Iskander M, et al. SNVPhyl: a single  
779 nucleotide variant phylogenomics pipeline for microbial genomic epidemiology. Microb Genom.  
780 2017 Jun 30;3(6):e000116.
- 781 50. Hwang S, Kim E, Lee I, Marcotte EM. Systematic comparison of variant calling pipelines using  
782 gold standard personal exome variants. Sci Rep. 2015 Dec 7;5:17875.
- 783 51. Li H. Toward better understanding of artifacts in variant calling from high-coverage samples.  
784 Bioinformatics. 2014 Oct 15;30(20):2843–51.
- 785 52. Liu X, Han S, Wang Z, Gelernter J, Yang B-Z. Variant Callers for Next-Generation Sequencing  
786 Data: A Comparison Study [Internet]. Vol. 8, PLoS ONE. 2013. p. e75619. Available from:  
787 <http://dx.doi.org/10.1371/journal.pone.0075619>
- 788 53. Pabinger S, Dander A, Fischer M, Snajder R, Sperk M, Efremova M, et al. A survey of tools for  
789 variant analysis of next-generation genome sequencing data. Brief Bioinform. 2014  
790 Mar;15(2):256–78.
- 791 54. Yu X, Sun S. Comparing a few SNP calling algorithms using low-coverage sequencing data.  
792 BMC Bioinformatics. 2013 Sep 17;14:274.
- 793 55. Jajou R, de Neeling A, van Hunen R, de Vries G, Schimmel H, Mulder A, et al. Epidemiological  
794 links between tuberculosis cases identified twice as efficiently by whole genome sequencing than  
795 conventional molecular typing: A population-based study [Internet]. Vol. 13, PLOS ONE. 2018.  
796 p. e0195413. Available from: <http://dx.doi.org/10.1371/journal.pone.0195413>
- 797 56. Coscollá M, Comas I, González-Candelas F. Quantifying nonvertical inheritance in the evolution  
798 of *Legionella pneumophila*. Mol Biol Evol. 2011 Feb;28(2):985–1001.
- 799 57. Valenzuela D, Norri T, Välimäki N, Pitkänen E, Mäkinen V. Towards pan-genome read  
800 alignment to improve variation calling. BMC Genomics. 2018 May 9;19(Suppl 2):87.
- 801 58. Computational Pan-Genomics Consortium. Computational pan-genomics: status, promises and  
802 challenges. Brief Bioinform. 2018 Jan 1;19(1):118–35.
- 803 59. Jandrasits C, Kröger S, Haas W, Renard BY. Computational pan-genome mapping and pairwise  
804 SNP-distance improve detection of *Mycobacterium tuberculosis* transmission clusters. PLoS



- 805 Comput Biol. 2019 Dec 9;15(12):e1007527.
- 806 60. Chen N-C, Solomon B, Mun T, Iyer S, Langmead B. Reducing reference bias using multiple  
807 population reference genomes. *BioRxiv*:2020.03.03.975219 [Preprint]. 2020 [cited 2010 March  
808 21]. Available from: <http://dx.doi.org/10.1101/2020.03.03.975219>
- 809 61. Hedge J, Wilson DJ. Bacterial Phylogenetic Reconstruction from Whole Genomes Is Robust to  
810 Recombination but Demographic Inference Is Not [Internet]. Vol. 5, *mBio*. 2014. Available  
811 from: <http://dx.doi.org/10.1128/mbio.02158-14>
- 812 62. Duchêne S, Holt KE, Weill F-X, Le Hello S, Hawkey J, Edwards DJ, et al. Genome-scale rates  
813 of evolutionary change in bacteria. *Microb Genom*. 2016 Nov;2(11):e000094.
- 814 63. Didelot X, Maiden MCJ. Impact of recombination on bacterial evolution. *Trends Microbiol*.  
815 2010 Jul;18(7):315–22.
- 816 64. von Wintersdorff CJH, Penders J, van Niekerk JM, Mills ND, Majumder S, van Alphen LB, et  
817 al. Dissemination of Antimicrobial Resistance in Microbial Ecosystems through Horizontal Gene  
818 Transfer. *Front Microbiol*. 2016 Feb 19;7:173.
- 819 65. Benson DA, Cavanaugh M, Clark K, Karsch-Mizrachi I, Ostell J, Pruitt KD, et al. GenBank.  
820 *Nucleic Acids Res*. 2018 Jan 4;46(D1):D41–7.
- 821 66. Seemann T. Prokka: rapid prokaryotic genome annotation. *Bioinformatics*. 2014 Jul  
822 15;30(14):2068–9.
- 823 67. Lechner M, Findeiss S, Steiner L, Marz M, Stadler PF, Prohaska SJ. Proteinortho: detection of  
824 (co-)orthologs in large-scale analysis. *BMC Bioinformatics*. 2011 Apr 28;12:124.
- 825 68. Katoh K, Standley DM. MAFFT multiple sequence alignment software version 7: improvements  
826 in performance and usability. *Mol Biol Evol*. 2013 Apr;30(4):772–80.
- 827 69. Nguyen L-T, Schmidt HA, von Haeseler A, Minh BQ. IQ-TREE: a fast and effective stochastic  
828 algorithm for estimating maximum-likelihood phylogenies. *Mol Biol Evol*. 2015 Jan;32(1):268–  
829 74.
- 830 70. Hoang DT, Chernomor O, von Haeseler A, Minh BQ, Vinh LS. UFBoot2: Improving the  
831 Ultrafast Bootstrap Approximation. *Mol Biol Evol*. 2018 Feb 1;35(2):518–22.
- 832 71. Darling AE, Mau B, Perna NT. progressiveMauve: multiple genome alignment with gene gain,  
833 loss and rearrangement. *PLoS One*. 2010 Jun 25;5(6):e11147.
- 834 72. Goris J, Konstantinidis KT, Klappenbach JA, Coenye T, Vandamme P, Tiedje JM. DNA-DNA  
835 hybridization values and their relationship to whole-genome sequence similarities. *Int J Syst  
836 Evol Microbiol*. 2007 Jan;57(Pt 1):81–91.
- 837 73. Jain C, Rodriguez-R LM, Phillippy AM, Konstantinidis KT, Aluru S. High throughput ANI  
838 analysis of 90K prokaryotic genomes reveals clear species boundaries. *Nat Commun*. 2018 Nov  
839 30;9(1):5114.
- 840 74. Camacho C, Coulouris G, Avagyan V, Ma N, Papadopoulos J, Bealer K, et al. BLAST :  
841 architecture and applications [Internet]. Vol. 10, *BMC Bioinformatics*. 2009. p. 421. Available  
842 from: <http://dx.doi.org/10.1186/1471-2105-10-421>
- 843 75. Fry NK, Bangsberg JM, Bergmans A, Bernander S, Etienne J, Franzin L, et al. Designation of  
844 the European Working Group on Legionella Infection (EWGLI) Amplified Fragment Length  
845 Polymorphism Types of Legionella pneumophila Serogroup 1 and Results of Intercentre

- 846 Proficiency Testing Using a Standard Protocol. Vol. 21, European Journal of Clinical  
847 Microbiology & Infectious Diseases. 2002. p. 722–8.
- 848 76. R Core Team. R: A language and environment for statistical computing [Internet]. R Foundation  
849 for Statistical Computing; 2018. Available from: <https://www.R-project.org/>
- 850 77. Ewels P, Magnusson M, Lundin S, Källner M. MultiQC: summarize analysis results for multiple  
851 tools and samples in a single report. *Bioinformatics*. 2016 Oct 1;32(19):3047–8.
- 852 78. Martin M. Cutadapt removes adapter sequences from high-throughput sequencing reads. Vol. 17,  
853 *EMBnet.journal*. 2011. p. 10. Available from: <http://dx.doi.org/10.14806/ej.17.1.200>
- 854 79. Schmieder R, Edwards R. Quality control and preprocessing of metagenomic datasets.  
855 *Bioinformatics*. 2011 Mar 15;27(6):863–4.
- 856 80. Li H, Durbin R. Fast and accurate short read alignment with Burrows-Wheeler transform. Vol.  
857 25, *Bioinformatics*. 2009. p. 1754–60.
- 858 81. Li H, Handsaker B, Wysoker A, Fennell T, Ruan J, Homer N, et al. The Sequence  
859 Alignment/Map format and SAMtools. *Bioinformatics*. 2009 Aug 15;25(16):2078–9.
- 860 82. Li H. A statistical framework for SNP calling, mutation discovery, association mapping and  
861 population genetical parameter estimation from sequencing data. Vol. 27, *Bioinformatics*. 2011.  
862 p. 2987–93.
- 863 83. Yang Z. PAML 4: phylogenetic analysis by maximum likelihood. *Mol Biol Evol*. 2007  
864 Aug;24(8):1586–91.
- 865 84. Rice P, Longden I, Bleasby A. EMBOSS: the European Molecular Biology Open Software Suite.  
866 *Trends Genet*. 2000 Jun;16(6):276–7.
- 867 85. Hermann P, Heissl A, Tiemann-Boege I, Futschik A. LDJump: Estimating variable  
868 recombination rates from population genetic data. *Mol Ecol Resour*. 2019 May;19(3):623–38.
- 869 86. Wickham H. ggplot2: Elegant Graphics for Data Analysis. Springer; 2016. Available from:  
870 <https://ggplot2.tidyverse.org>.
- 871 87. Letunic I, Bork P. Interactive Tree Of Life (iTOL) v4: recent updates and new developments.  
872 *Nucleic Acids Res*. 2019 Jul 2;47(W1):W256–9.
- 873 88. Strimmer K, Rambaut A. Inferring confidence sets of possibly misspecified gene trees. *Proc Biol*  
874 *Sci*. 2002 Jan 22;269(1487):137–42.
- 875 89. Bogdanowicz D, Giaro K, Wróbel B. TreeCmp: Comparison of Trees in Polynomial Time  
876 [Internet]. Vol. 8, *Evolutionary Bioinformatics*. 2012. p. EBO.S9657. Available from:  
877 <http://dx.doi.org/10.4137/ebo.s9657>
- 878 90. Robinson DF, Foulds LR. Comparison of phylogenetic trees. Vol. 53, *Mathematical Biosciences*.  
879 1981. p. 131–47.
- 880 91. Kruskal WH, Allen Wallis W. Use of Ranks in One-Criterion Variance Analysis. Vol. 47,  
881 *Journal of the American Statistical Association*. 1952. p. 583.
- 882 92. Rey D, Neuhäuser M. Wilcoxon-Signed-Rank Test. *International Encyclopedia of Statistical*  
883 *Science*. 2011. p. 1658–9.
- 884 93. Massey FJ. The Kolmogorov-Smirnov Test for Goodness of Fit. Vol. 46, *Journal of the*

885 American Statistical Association. 1951. p. 68–78.

886



887 **LEGENDS TO FIGURES**

888 **Fig 1. Distribution of proportion of mapped reads depending on reference choice.**

889 **Fig 2. Distribution of coverage of the reference genome depending on reference choice.**

890 **Fig 3. Distribution of the average depth depending on reference choice.**

891 **Fig 4. Distribution of the number of SNPs depending on reference choice.**

892 **Fig 5. Comparison of Robinson-Foulds (RF) and Matching Clusters (MC) normalized distances**  
893 **calculated between trees from the same species.**

894 **Fig 6. Comparison of RF distances against ANI calculated between the reference genomes**  
895 **selected for each species.**

896 **Fig 7. Impact of reference choice on phylogenetic trees of *L. pneumophila*.** ML trees included the  
897 selected reference sequences of *L. pneumophila* and the consensus sequences obtained from mappings  
898 against strains (A) Philadelphia 1, (B) Paris, (C) Alcoy and (D) Lansing 3. Clusters of isolates related  
899 with references Paris (red) and Alcoy (blue) are coloured in the first three phylogenies. Isolates  
900 28HGV and 91HGV (highlighted in yellow) were placed in different clades in the trees when using  
901 references Paris and Alcoy. Clade of references resulting from using Lansing 3 as reference genome is  
902 coloured in red.

903 **Fig 8. Impact of reference choice on phylogenetic trees of *K. pneumoniae*.** ML trees included the  
904 selected reference sequences from *K. pneumoniae* and the consensus sequences obtained from  
905 mappings against strains (A) HS11286 and (B) NTUH-K2044. Isolates HGV2C-06 and HCV1-10  
906 (yellow) changed their placement depending on reference choice.

907 **Fig 9. Impact of reference choice on phylogenetic trees of *P. aeruginosa*.**

908 ML trees included the selected reference sequences of *P. aeruginosa* and the consensus sequences  
909 obtained from mappings against strains (A) M18 and (B) 12939. Reference M18 and isolate P5M1  
910 (yellow) alter their phylogenetic relationships depending on reference choice.

911 **Fig 10. Impact of reference choice on phylogenetic trees of *S. marcescens*.**

912 ML trees included the selected reference sequences from *S. marcescens* and the consensus sequences  
913 calculated from alignments against strains (A) UMH9 and (B) WW4. Outbreak clade is shown in red.

914 **Fig 11. Recombination rate distribution depending on reference choice between ‘core’ MSAs**

915 **including sequences from *N. gonorrhoeae*.**

916 **Fig 12. Distribution of dN/dS depending on reference choice.**

917 **Fig 13. Overview of the workflow used.**

918

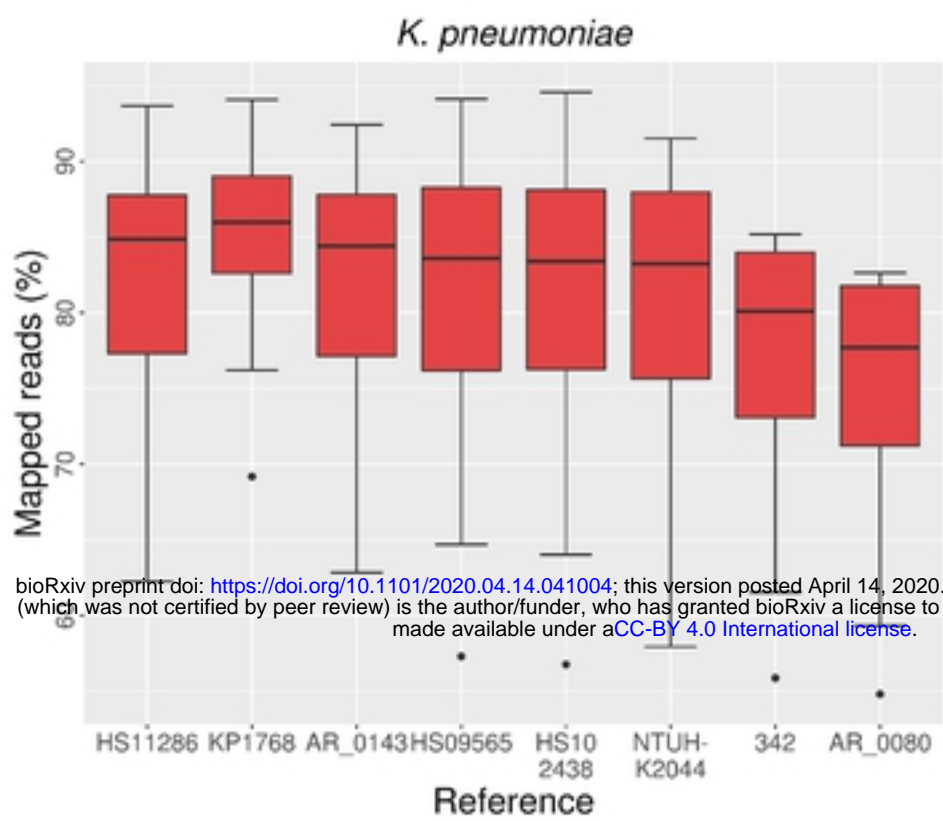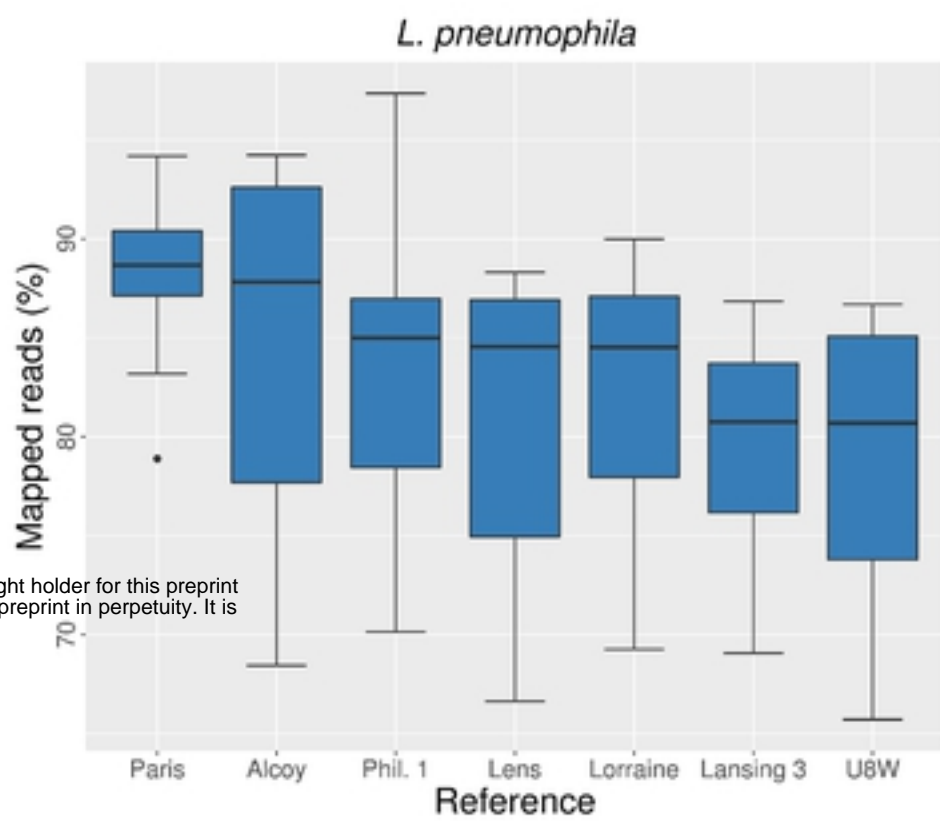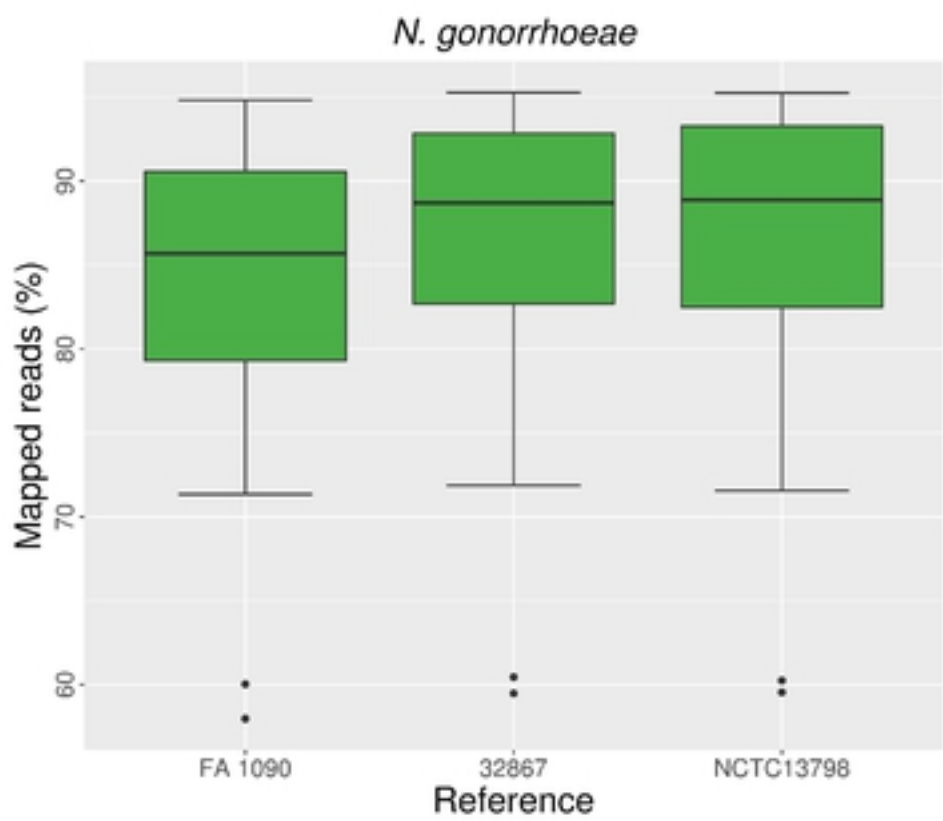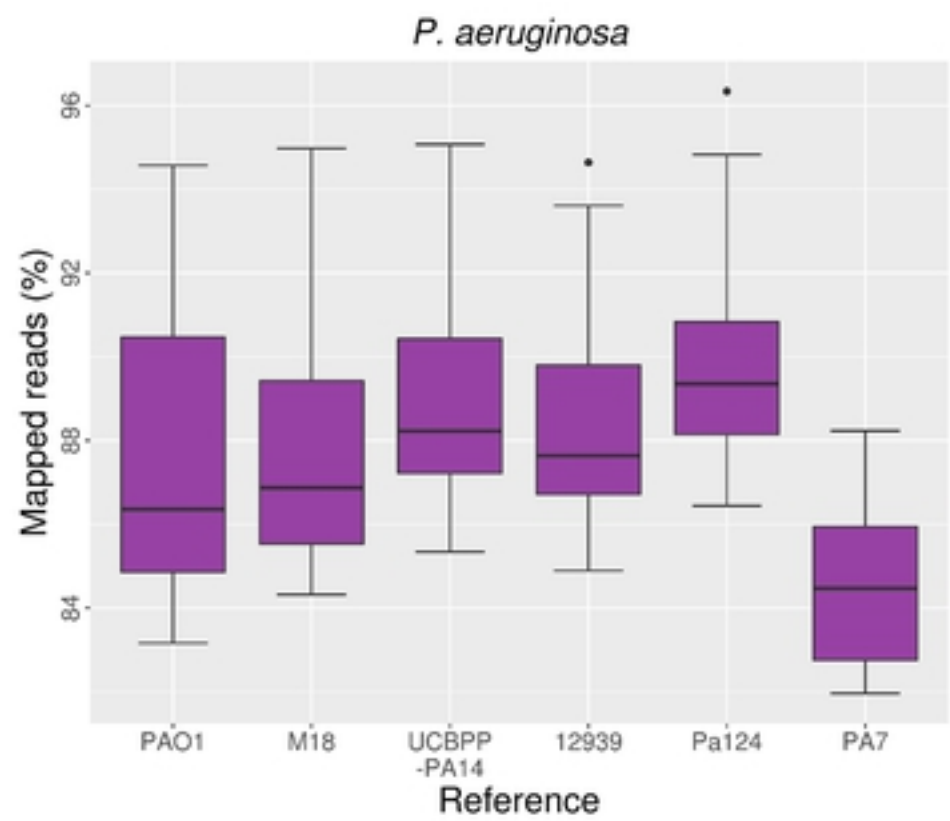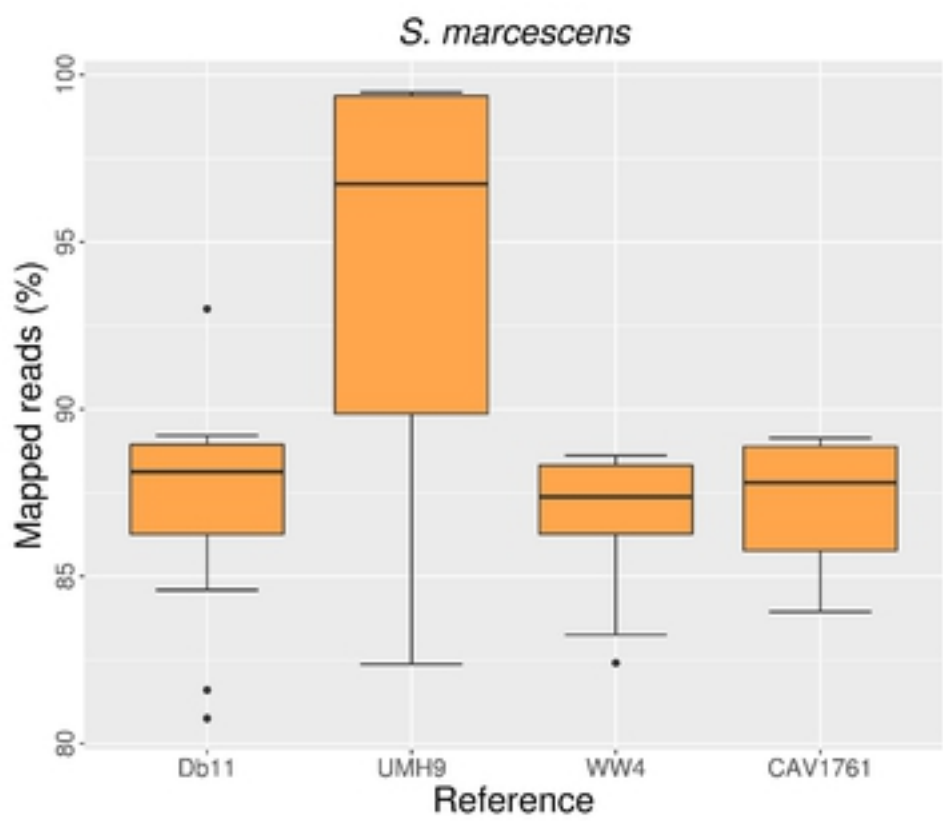

bioRxiv preprint doi: <https://doi.org/10.1101/2020.04.14.041004>; this version posted April 14, 2020. The copyright holder for this preprint (which was not certified by peer review) is the author/funder, who has granted bioRxiv a license to display the preprint in perpetuity. It is made available under aCC-BY 4.0 International license.

Fig1

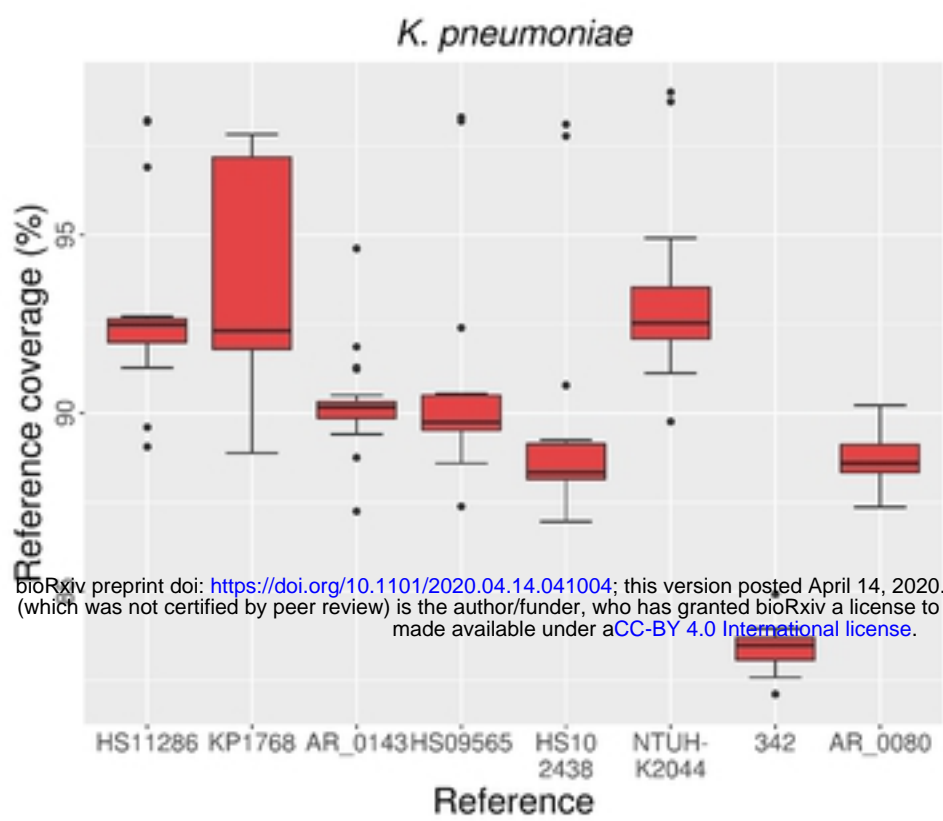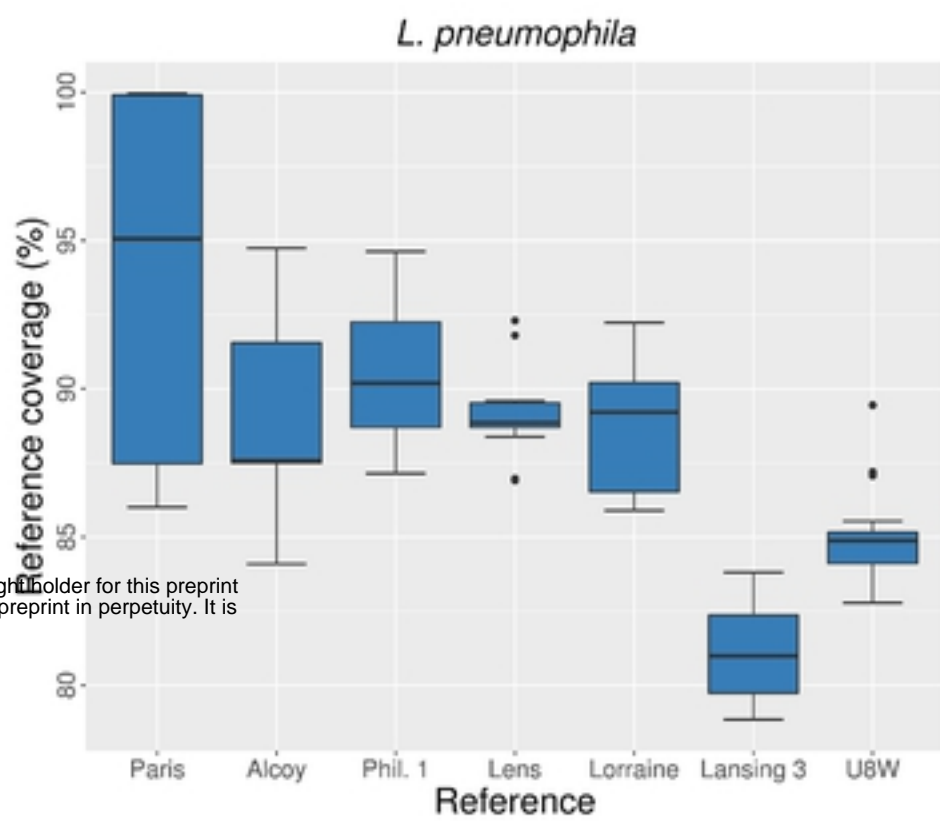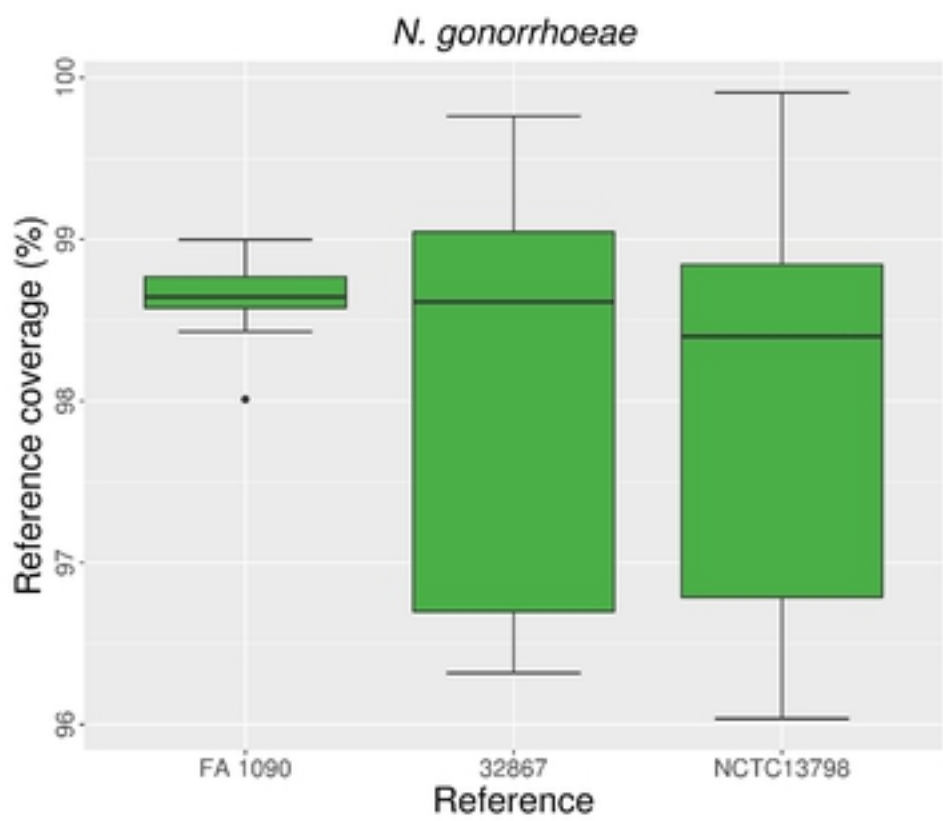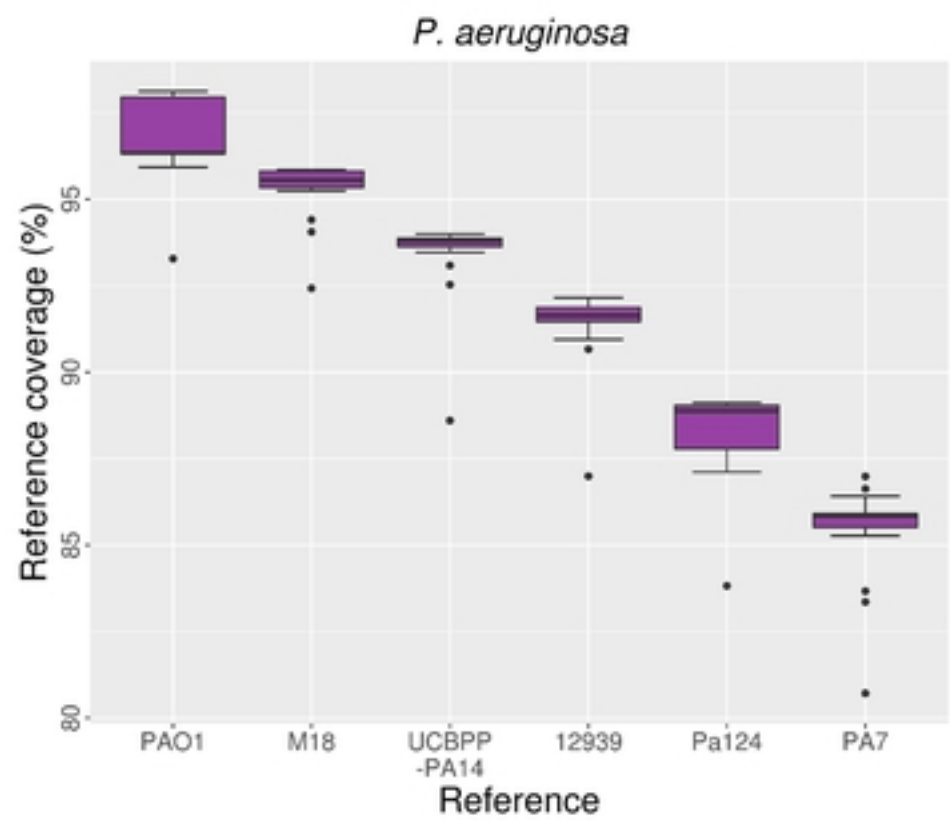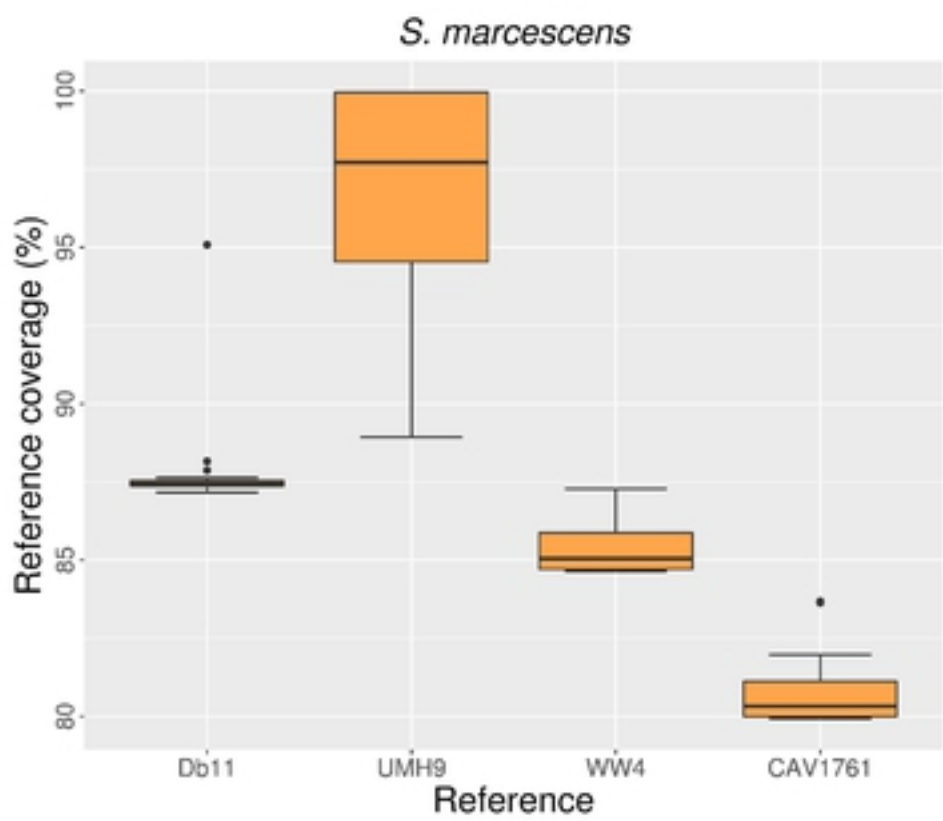

bioRxiv preprint doi: <https://doi.org/10.1101/2020.04.14.041004>; this version posted April 14, 2020. The copyright holder for this preprint (which was not certified by peer review) is the author/funder, who has granted bioRxiv a license to display the preprint in perpetuity. It is made available under aCC-BY 4.0 International license.

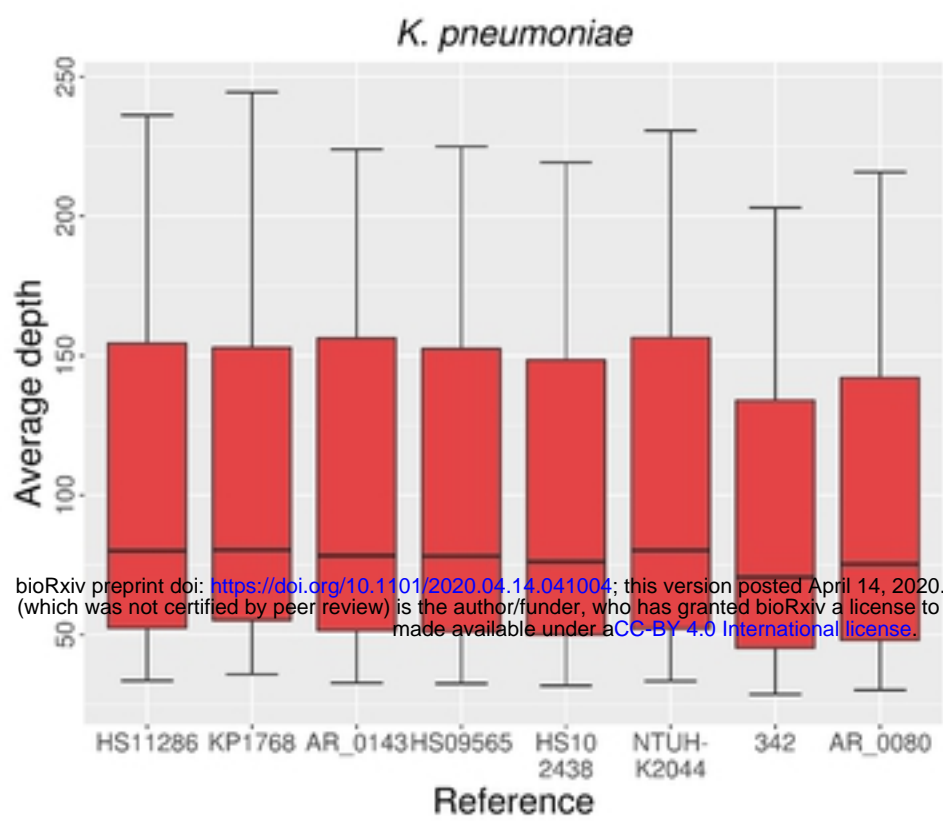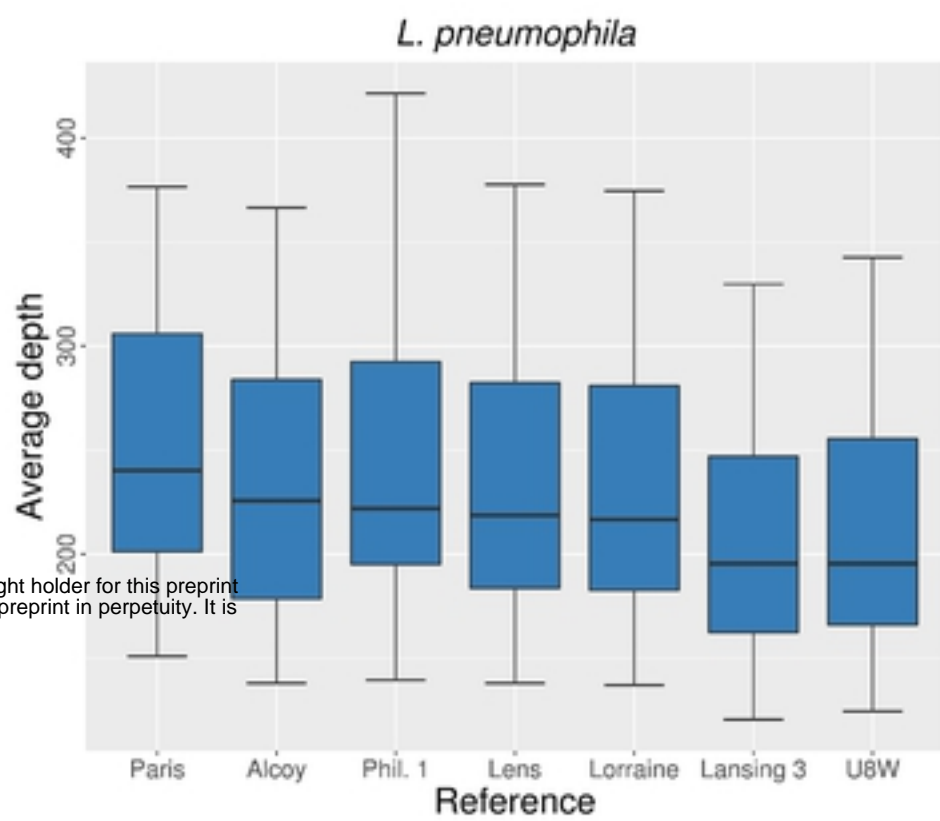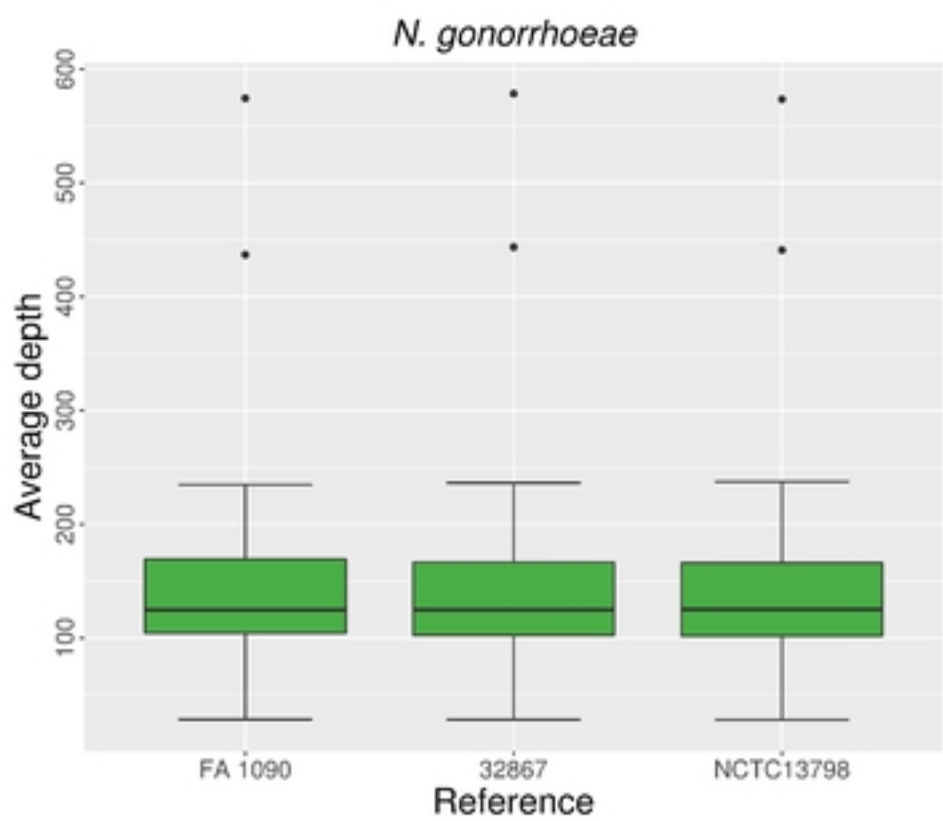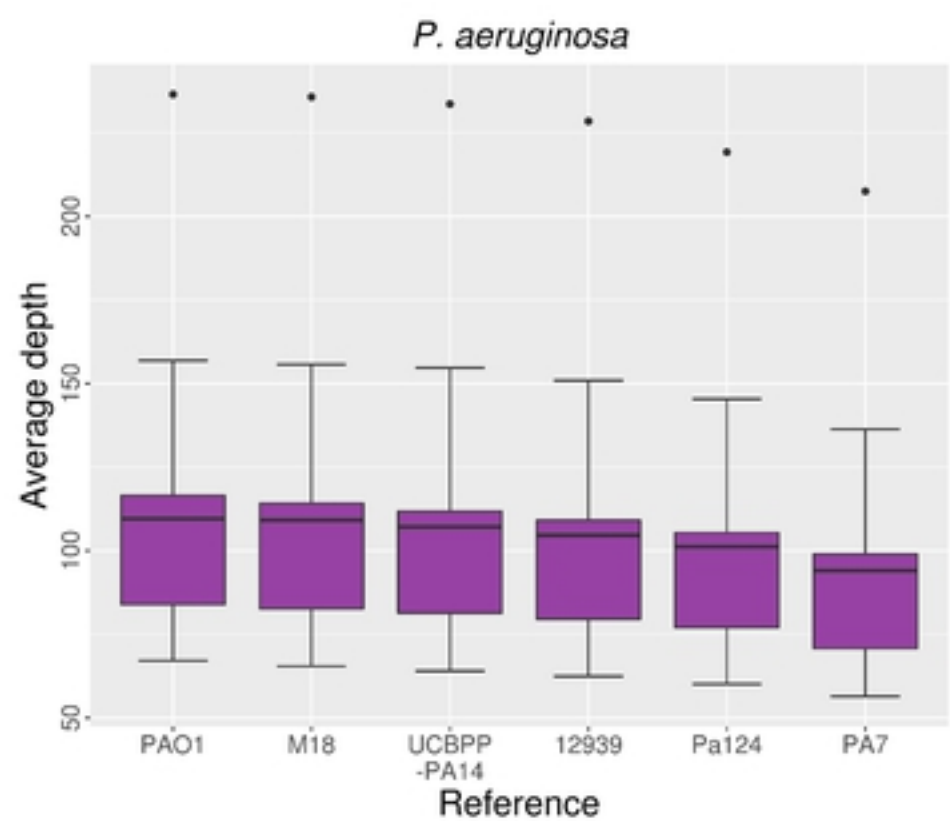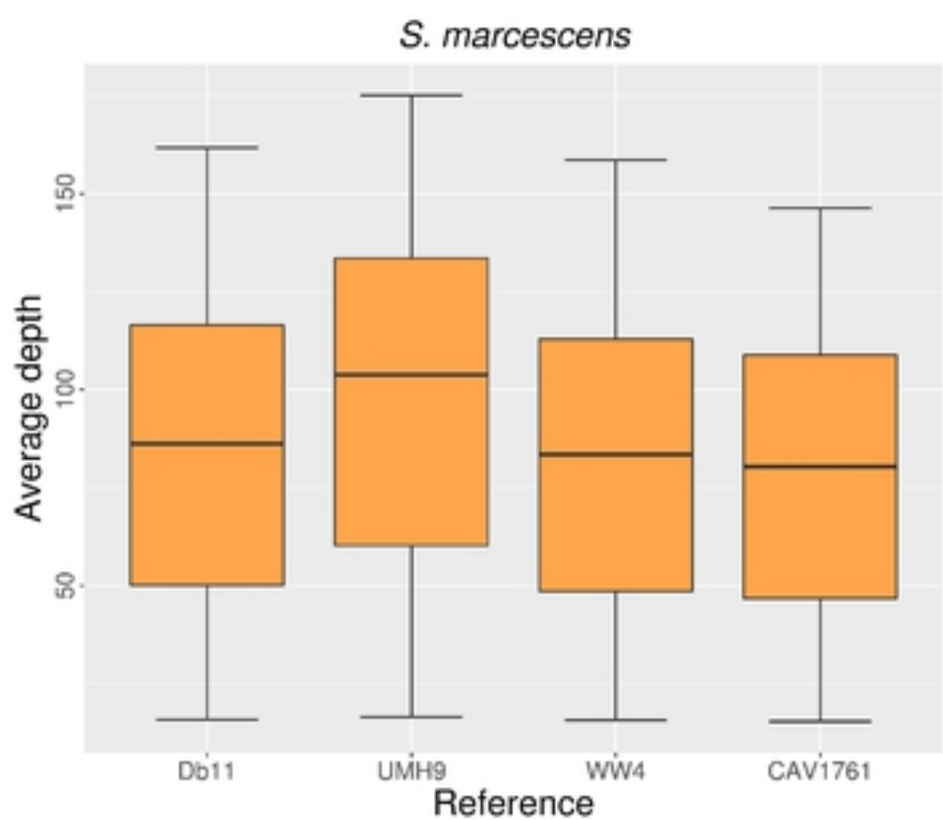

bioRxiv preprint doi: <https://doi.org/10.1101/2020.04.14.041004>; this version posted April 14, 2020. The copyright holder for this preprint (which was not certified by peer review) is the author/funder, who has granted bioRxiv a license to display the preprint in perpetuity. It is made available under aCC-BY 4.0 International license.

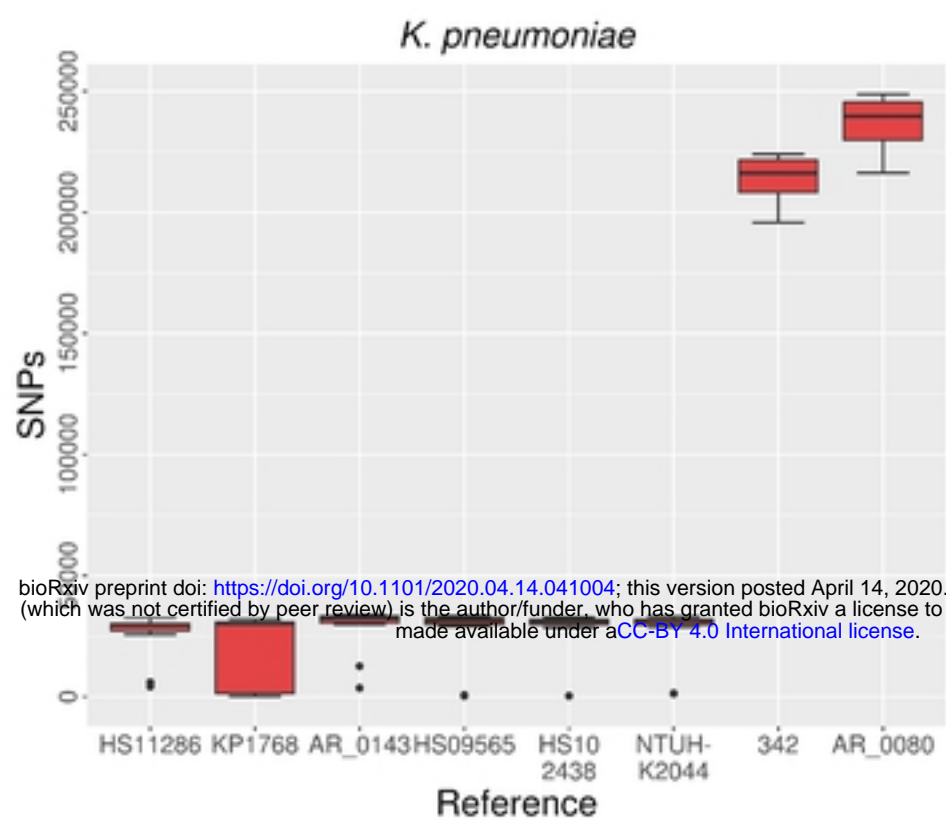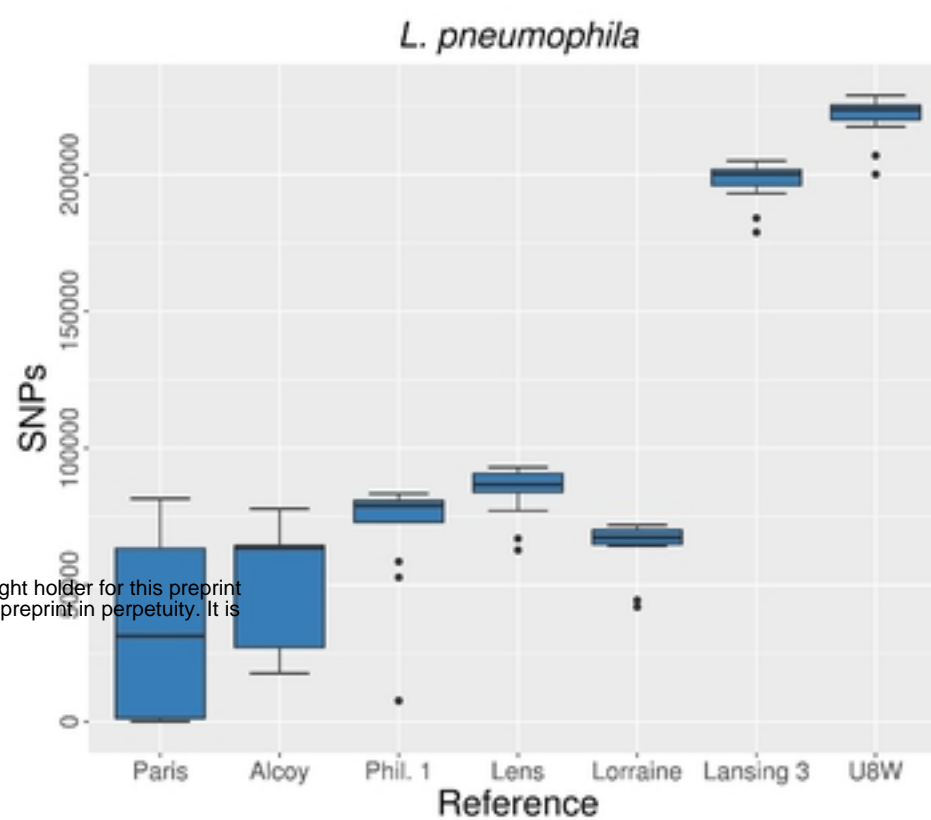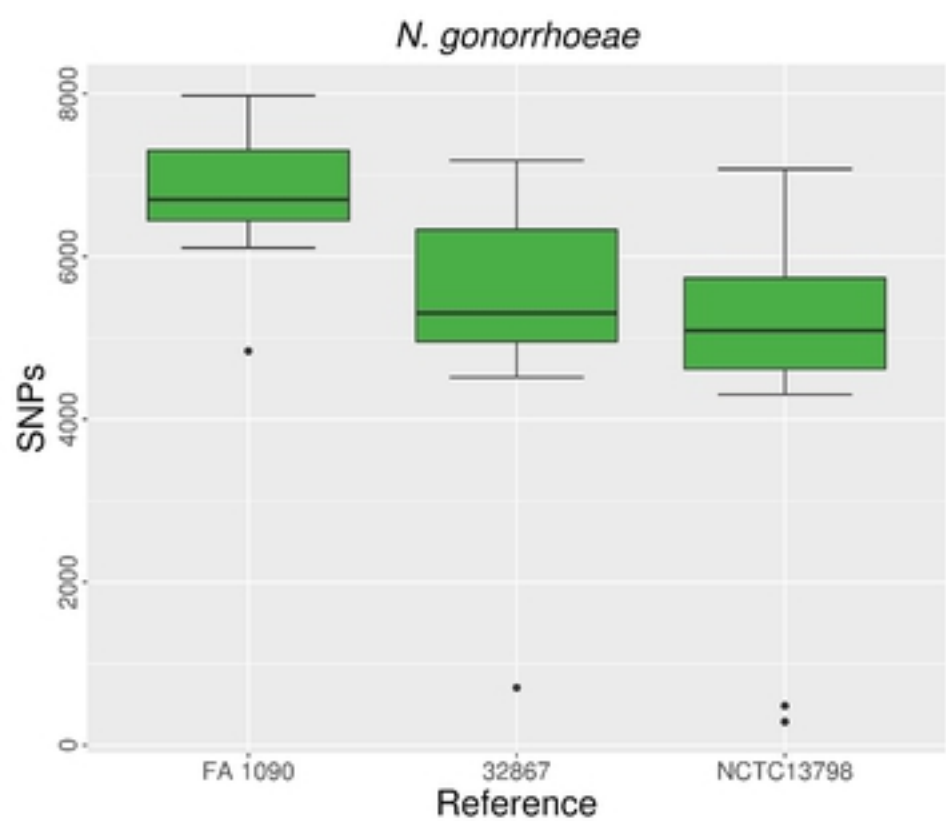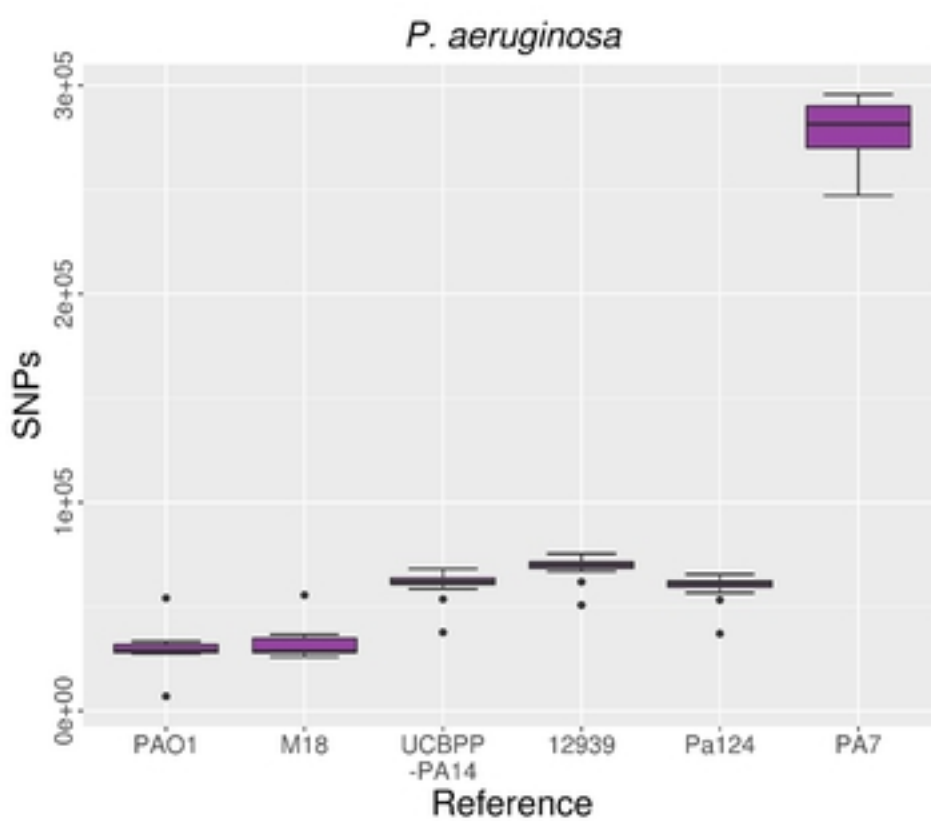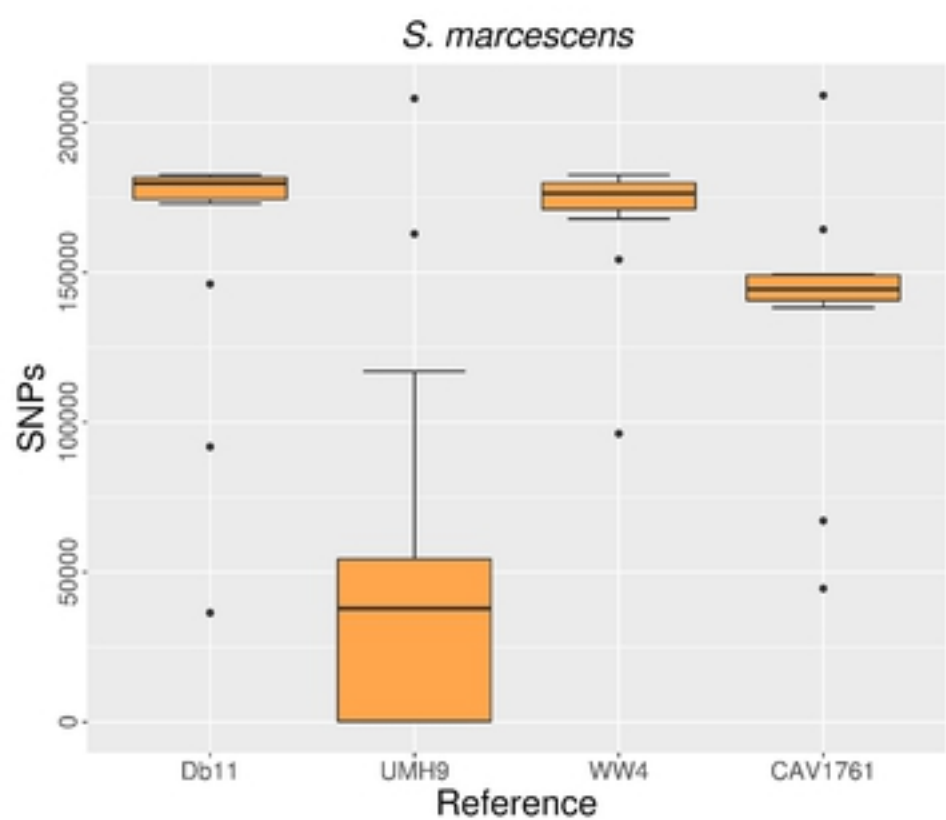

Fig4

bioRxiv preprint doi: <https://doi.org/10.1101/2020.04.14.041004>; this version posted April 14, 2020. The copyright holder for this preprint (which was not certified by peer review) is the author/funder, who has granted bioRxiv a license to display the preprint in perpetuity. It is made available under aCC-BY 4.0 International license.

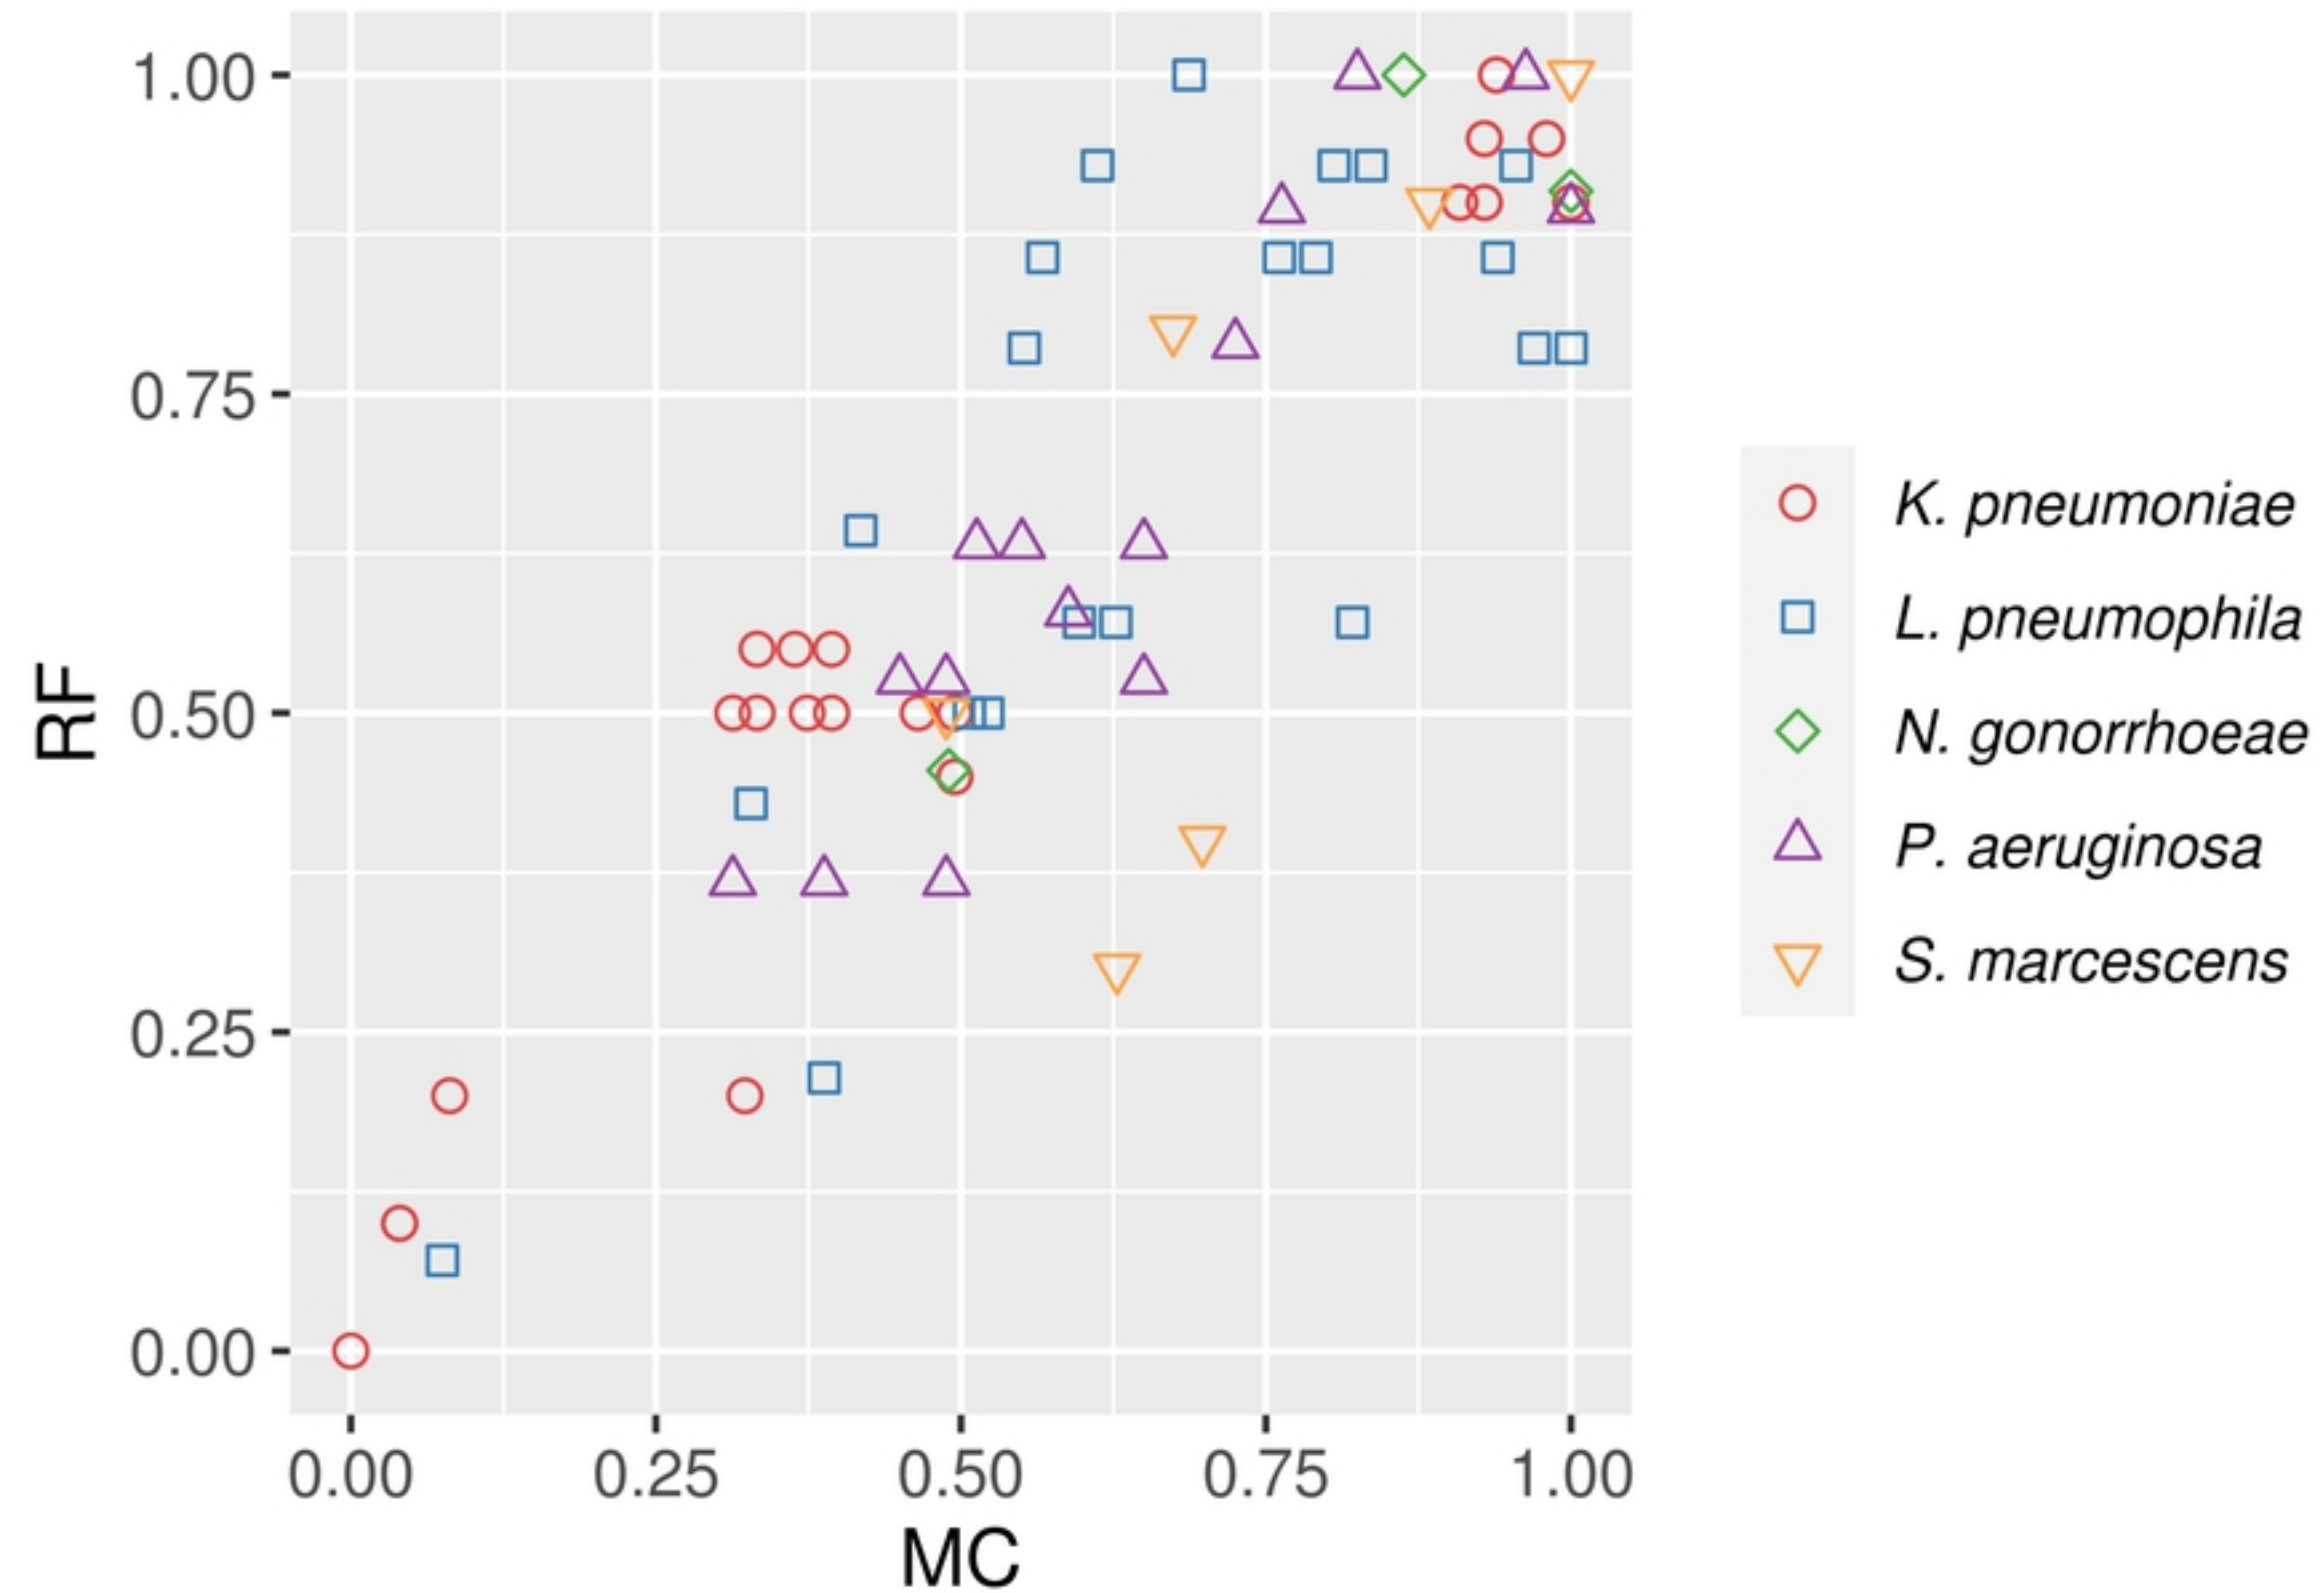

Fig5



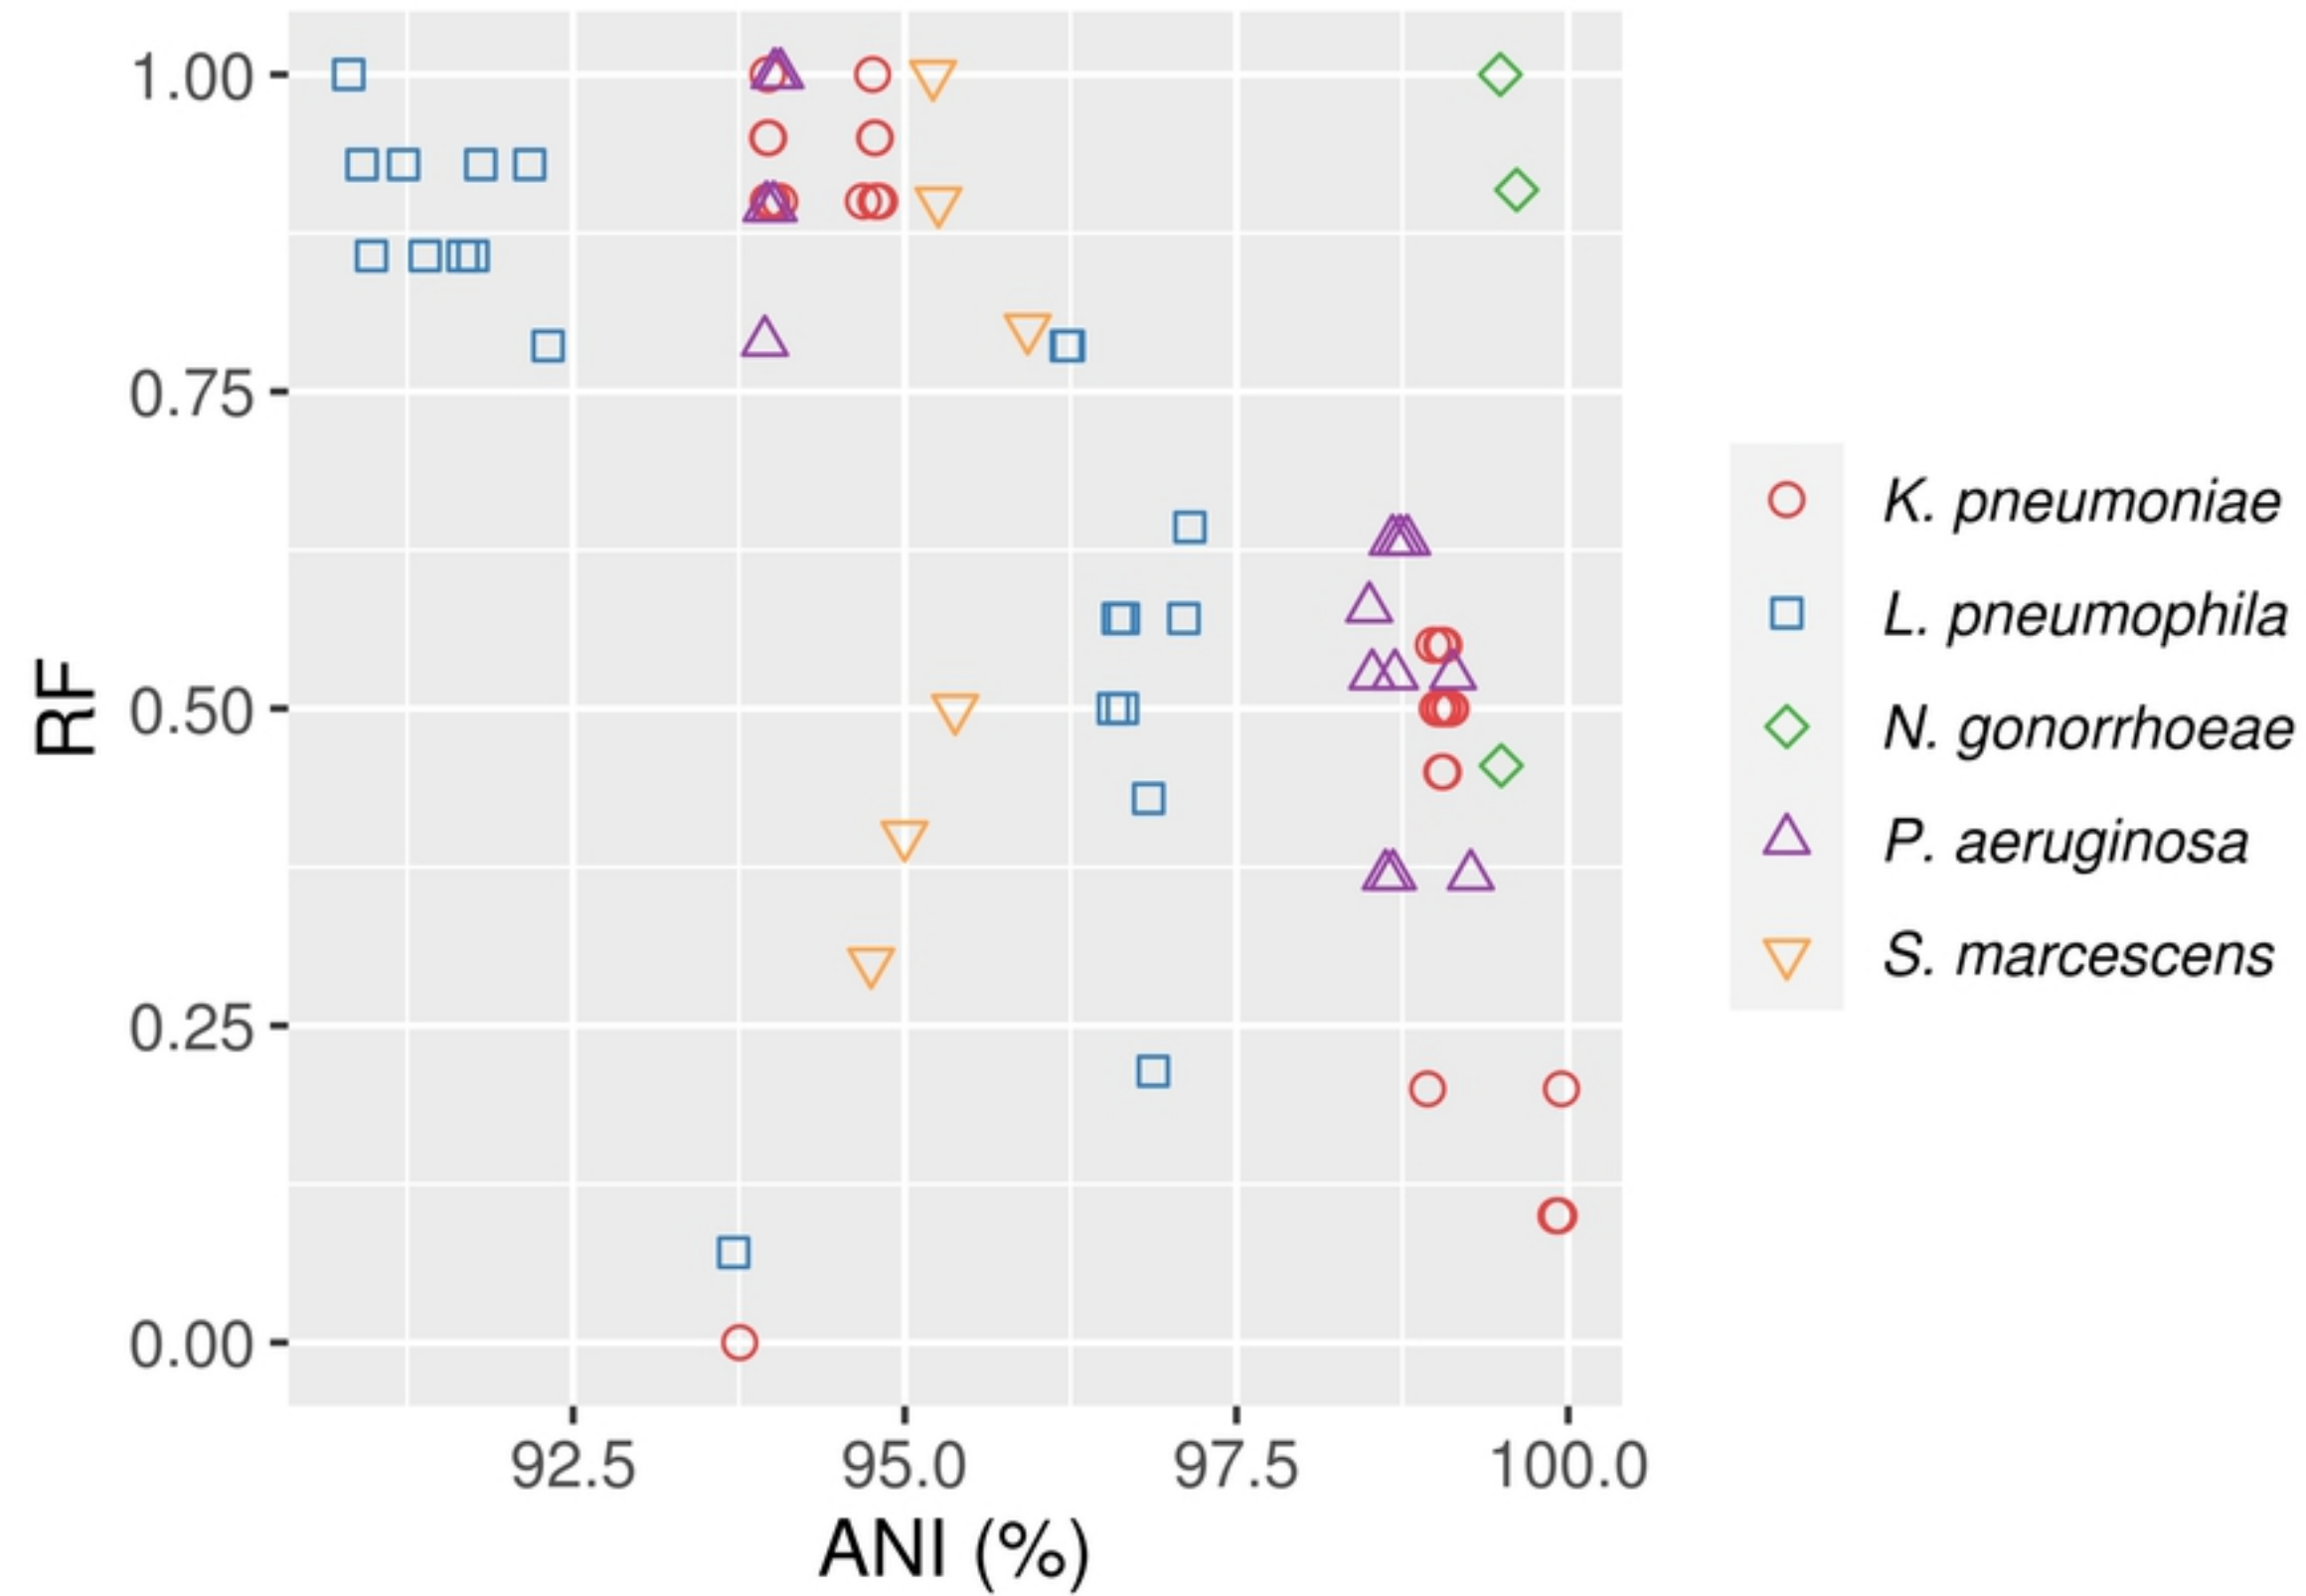

Fig6



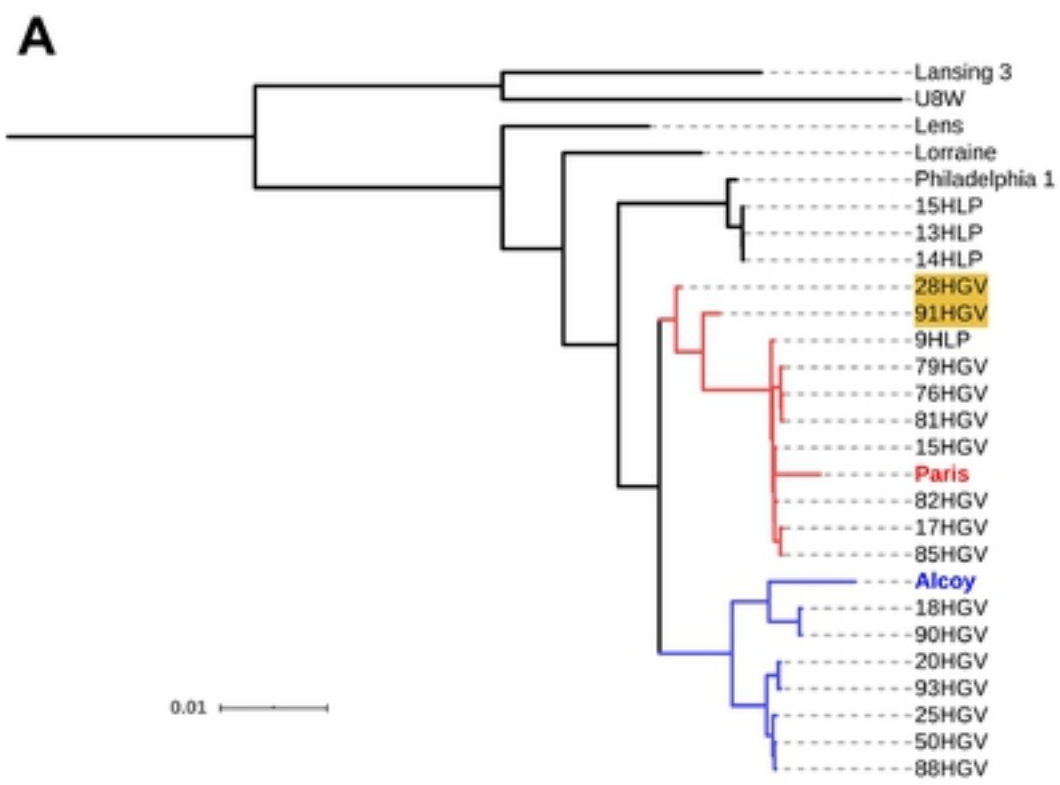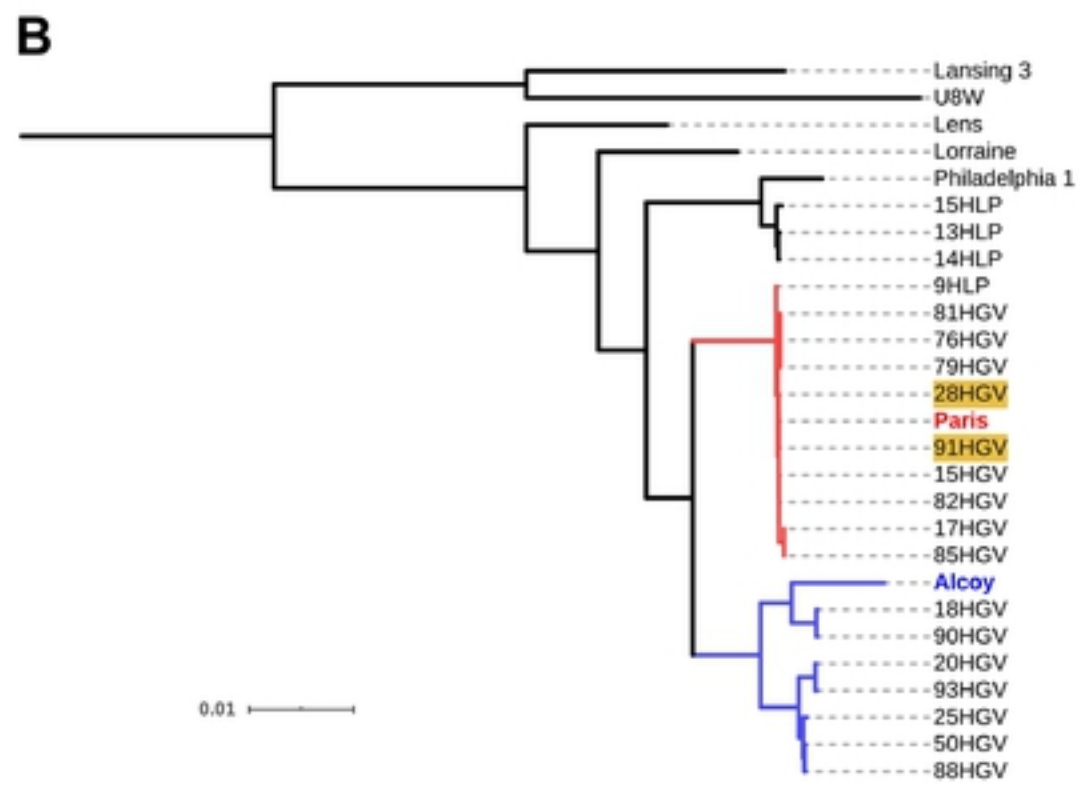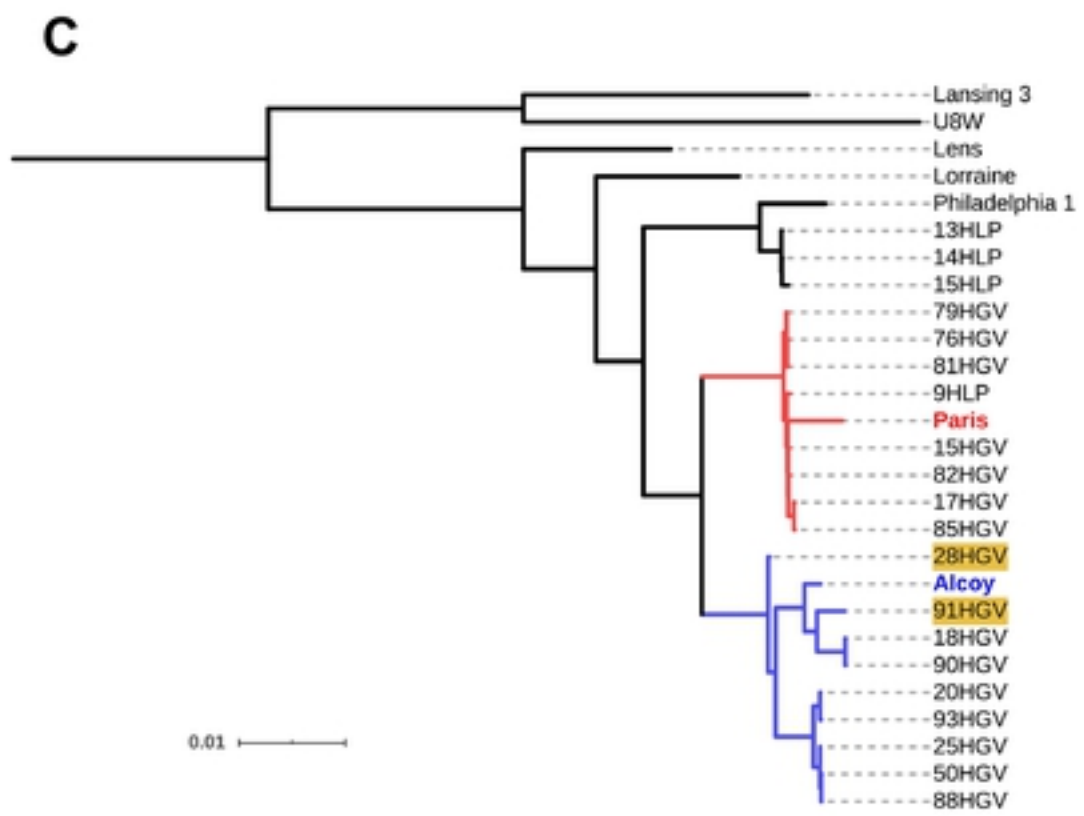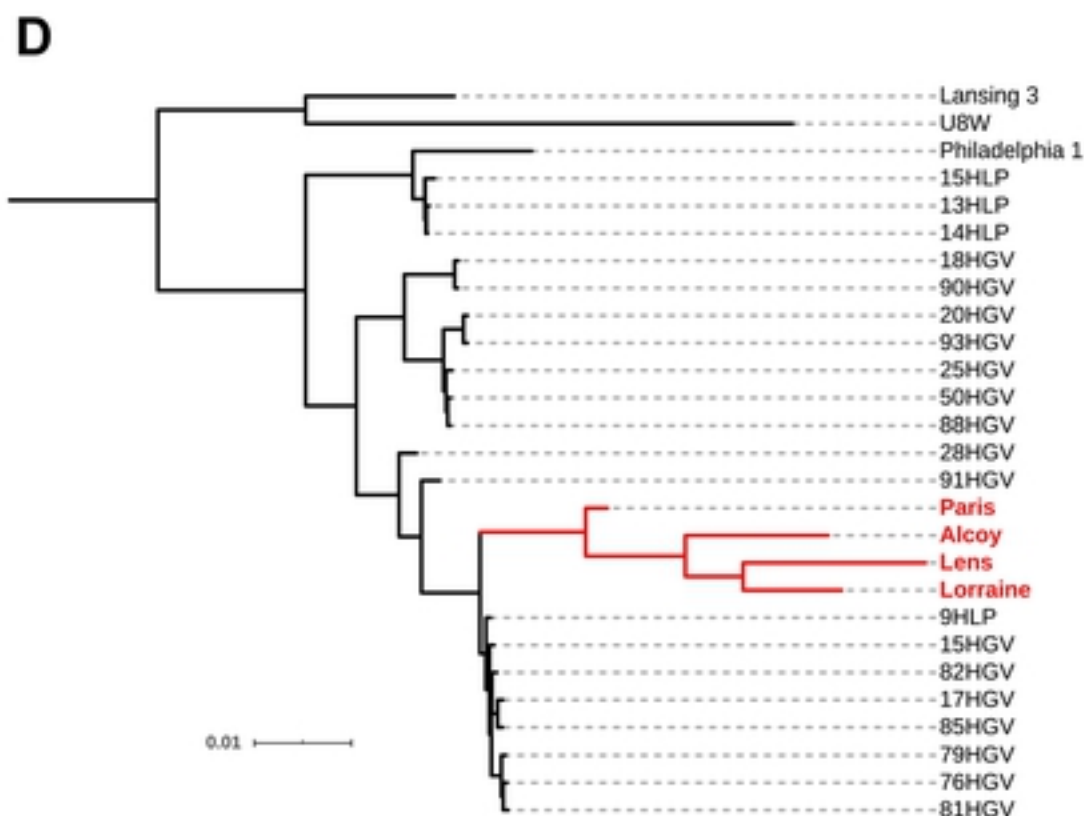

Fig7

**A**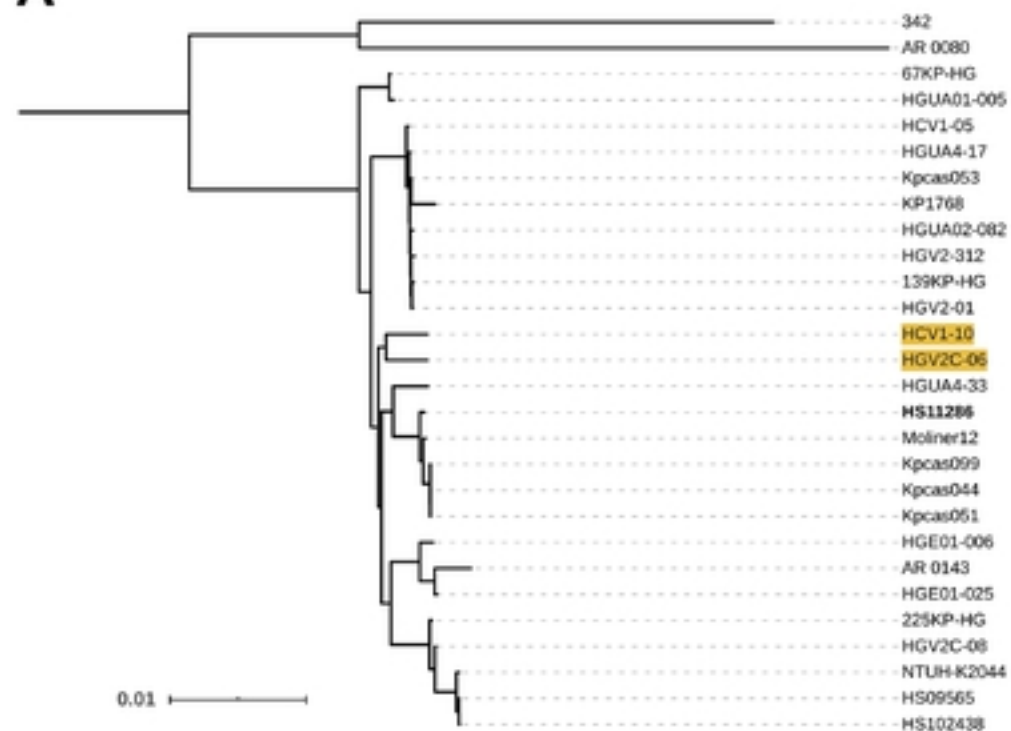**B**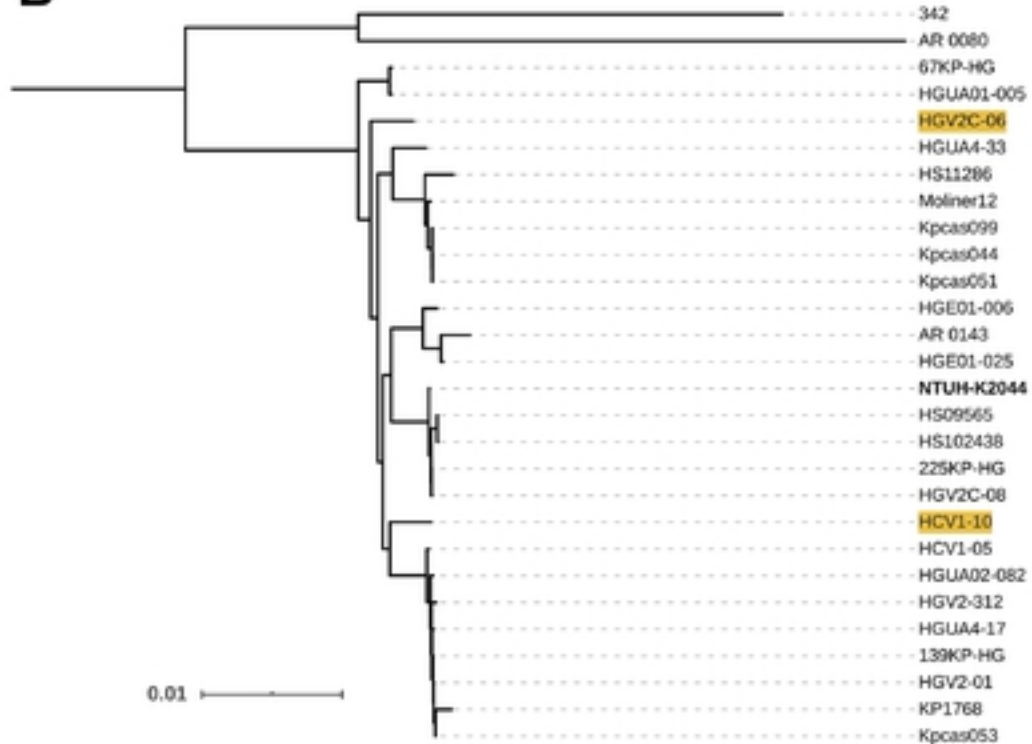

Fig8

**A**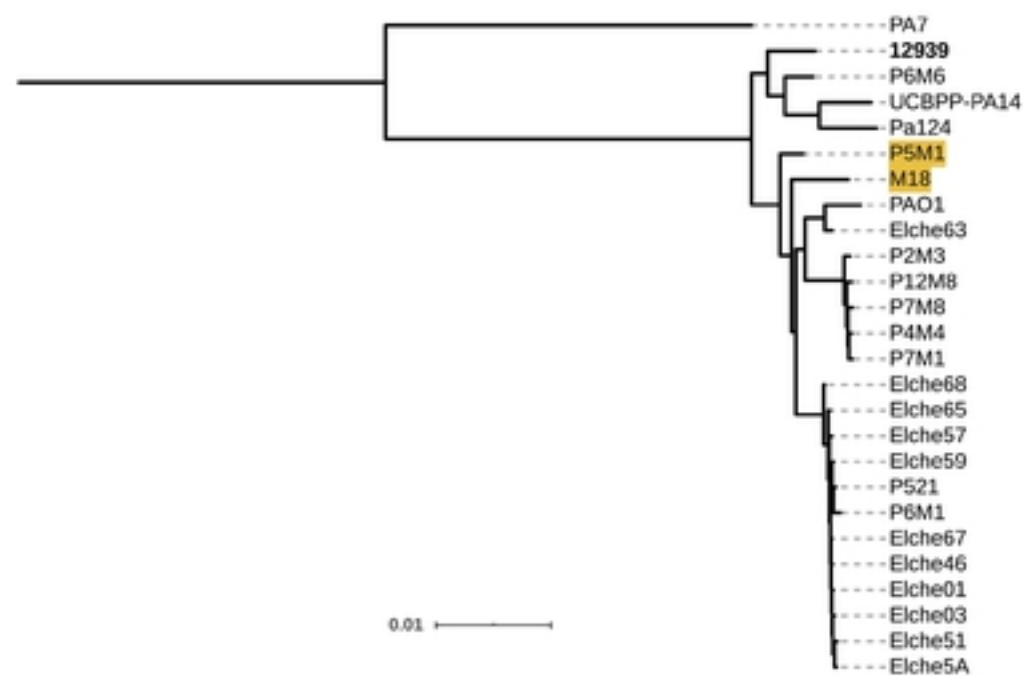**B**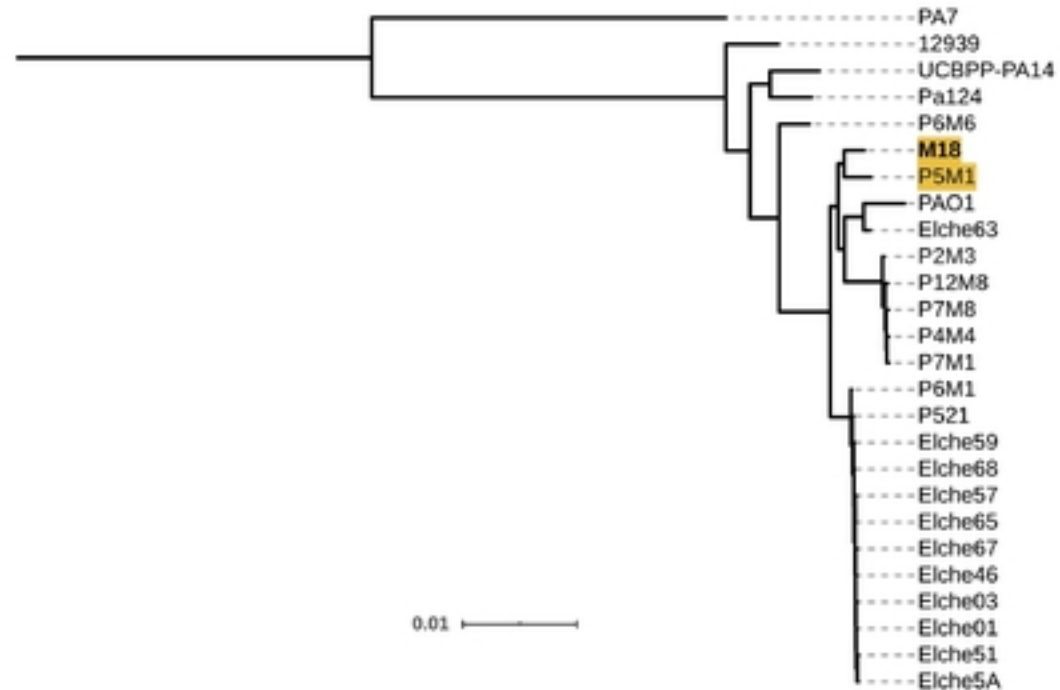

Fig9

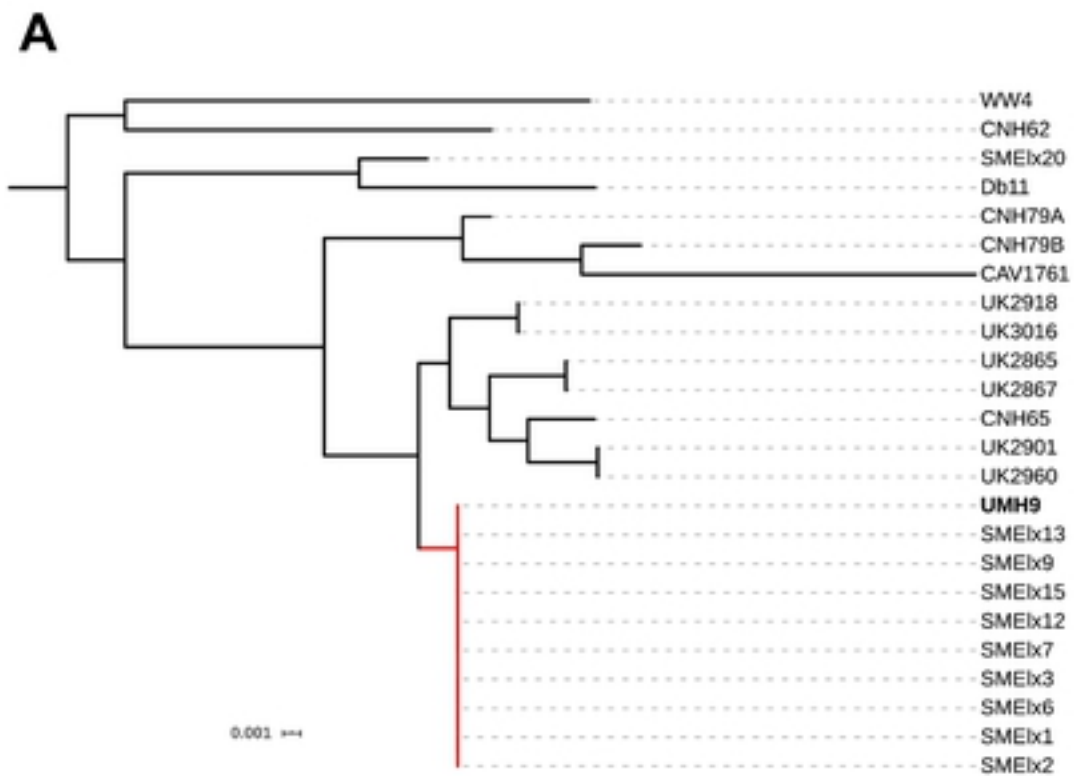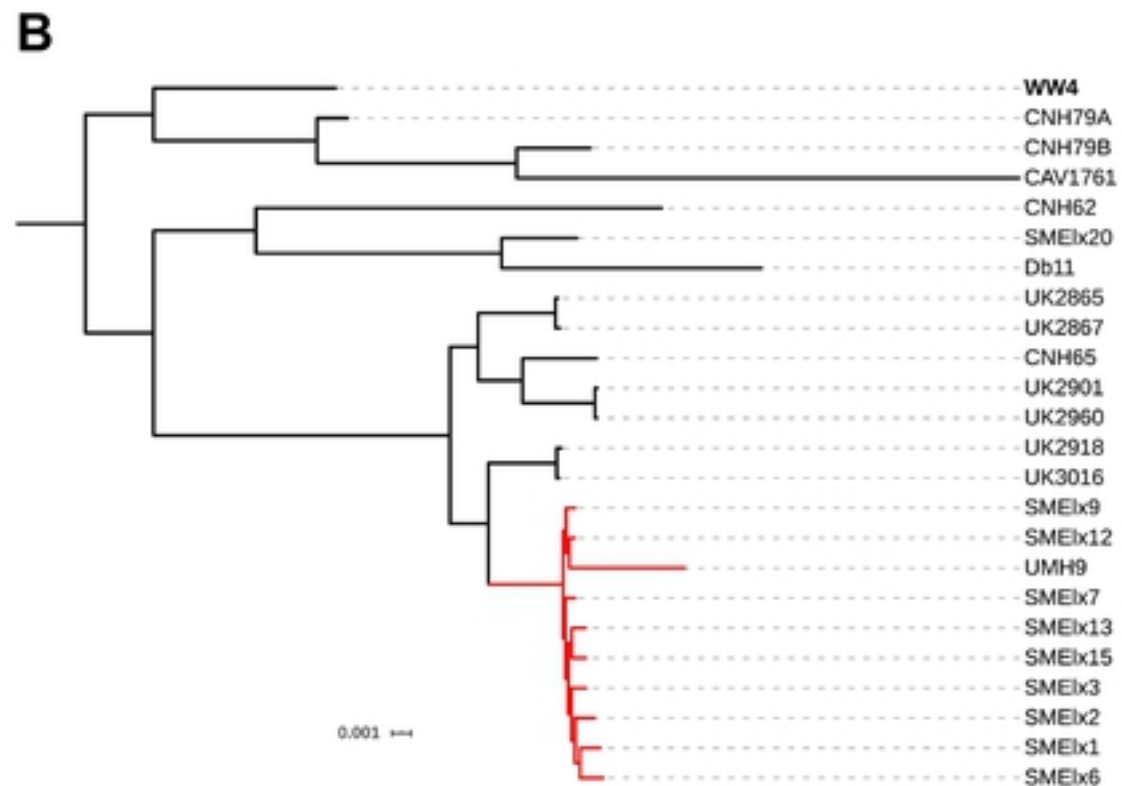

Fig10

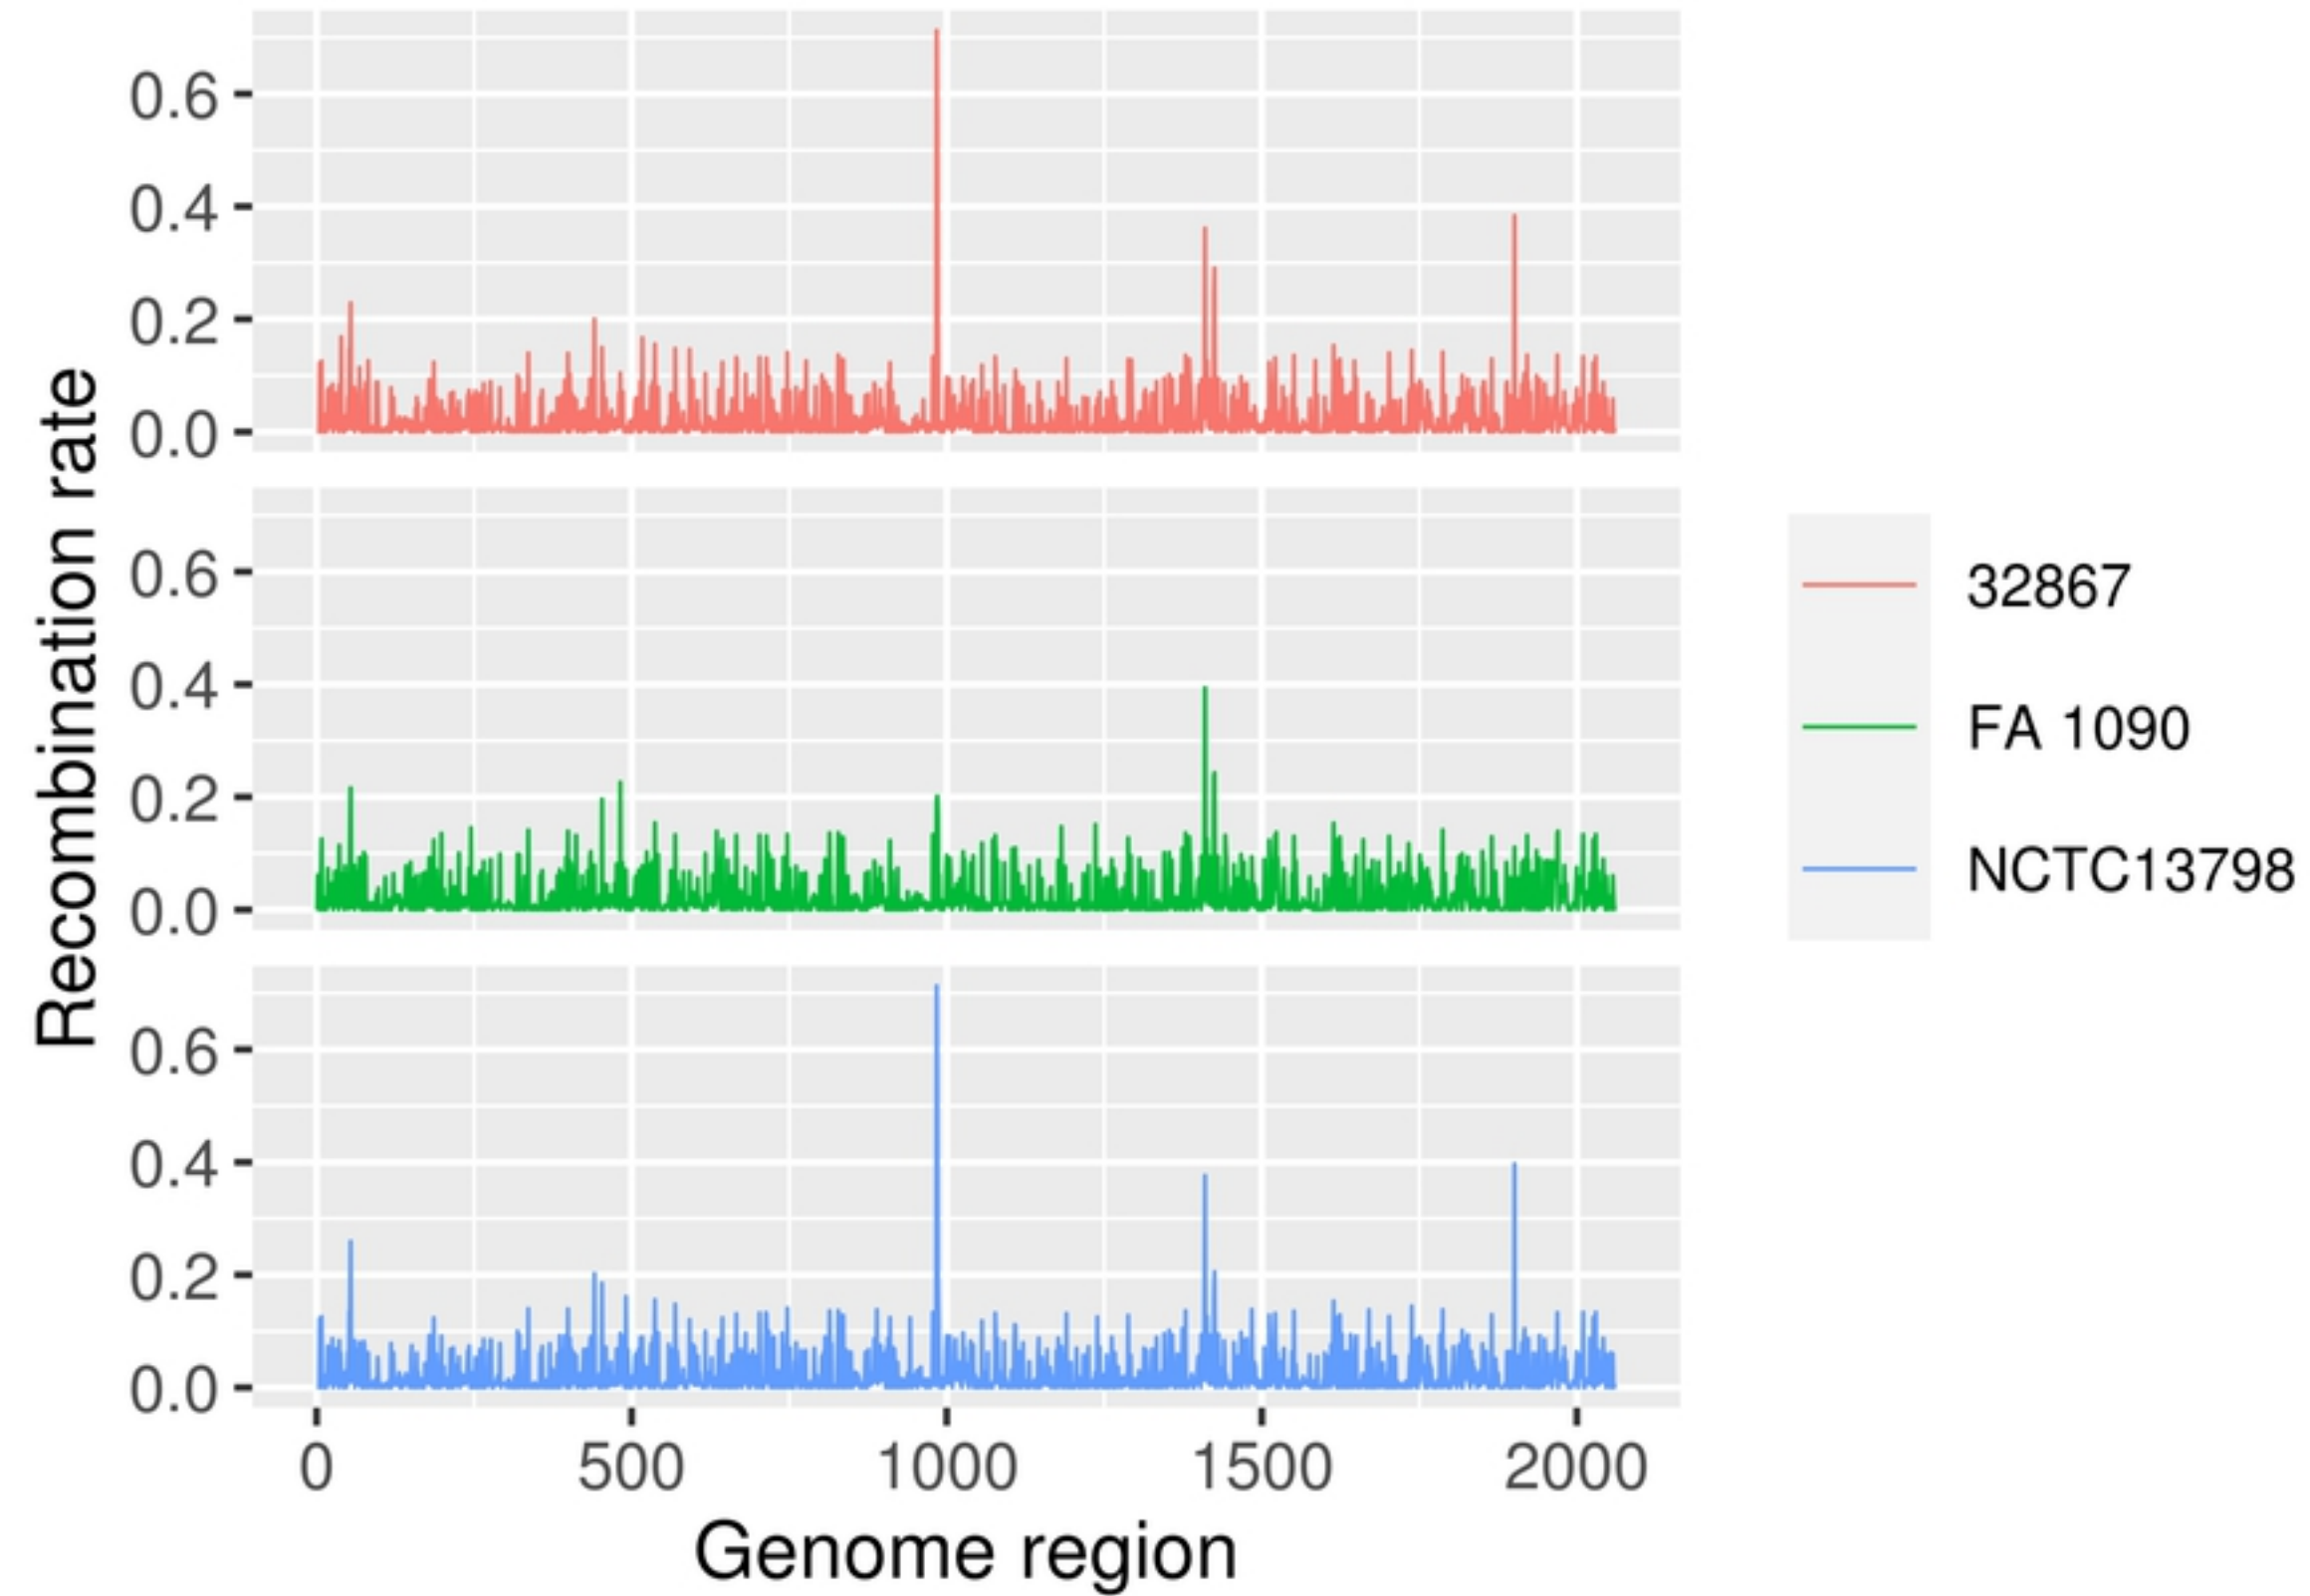

Fig11

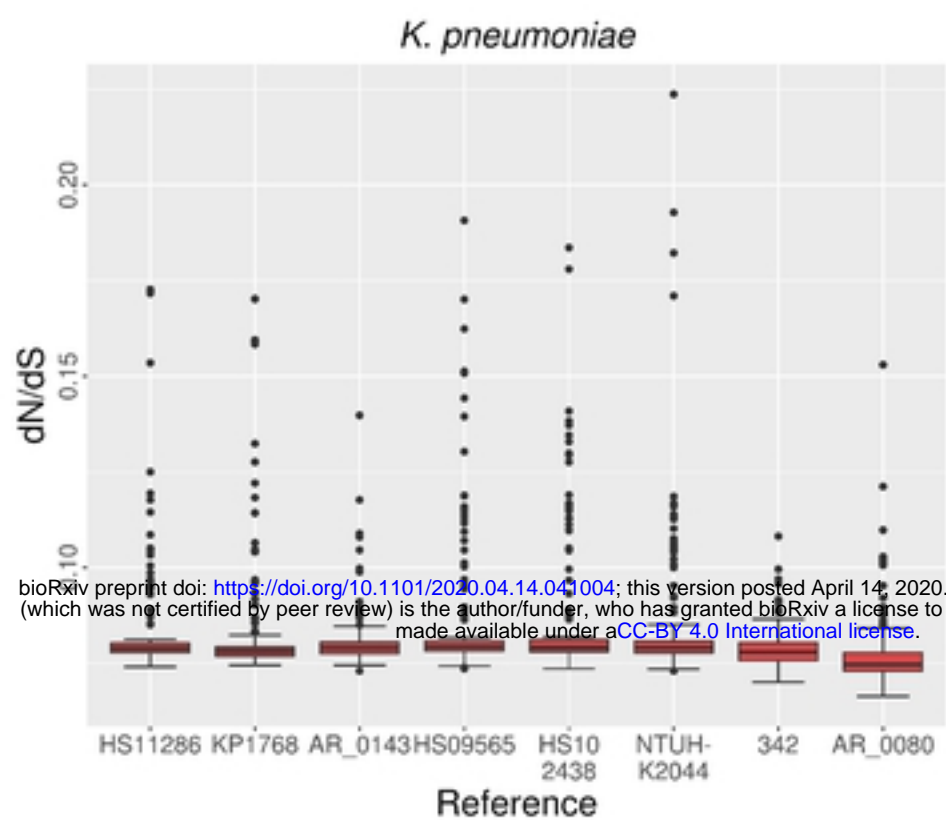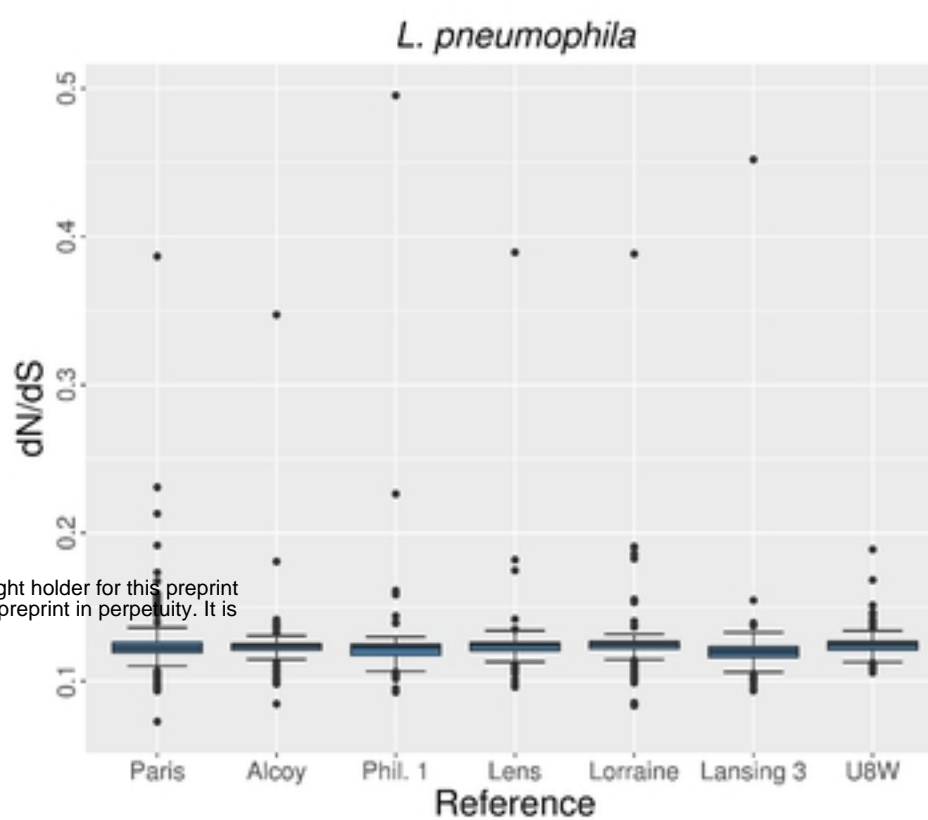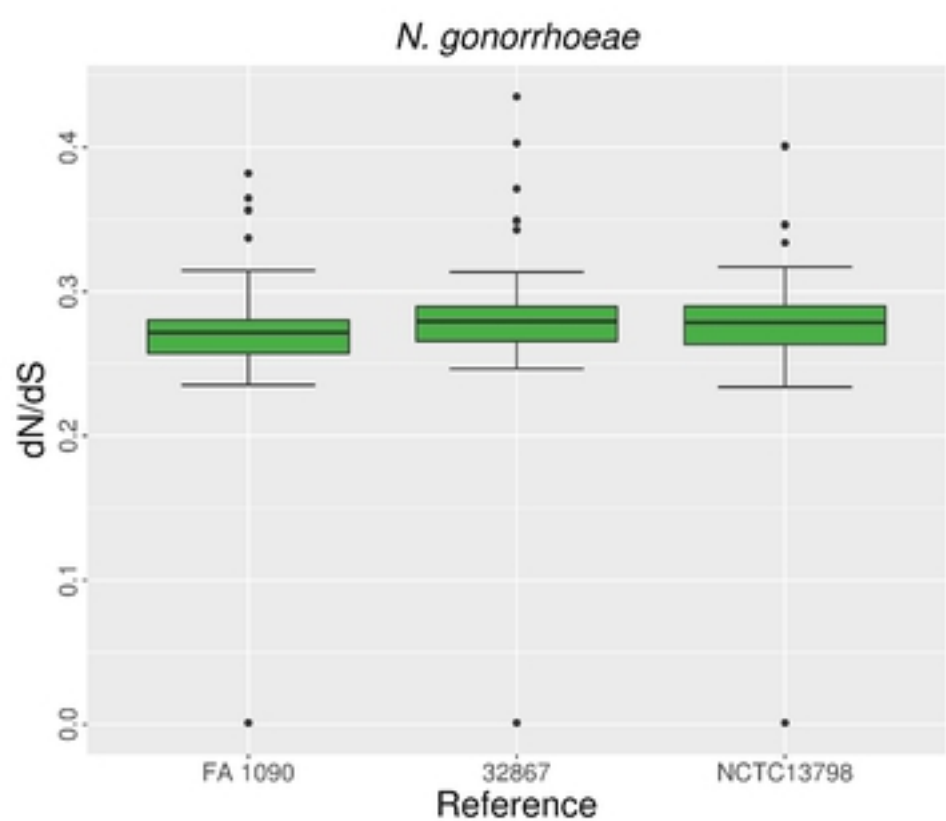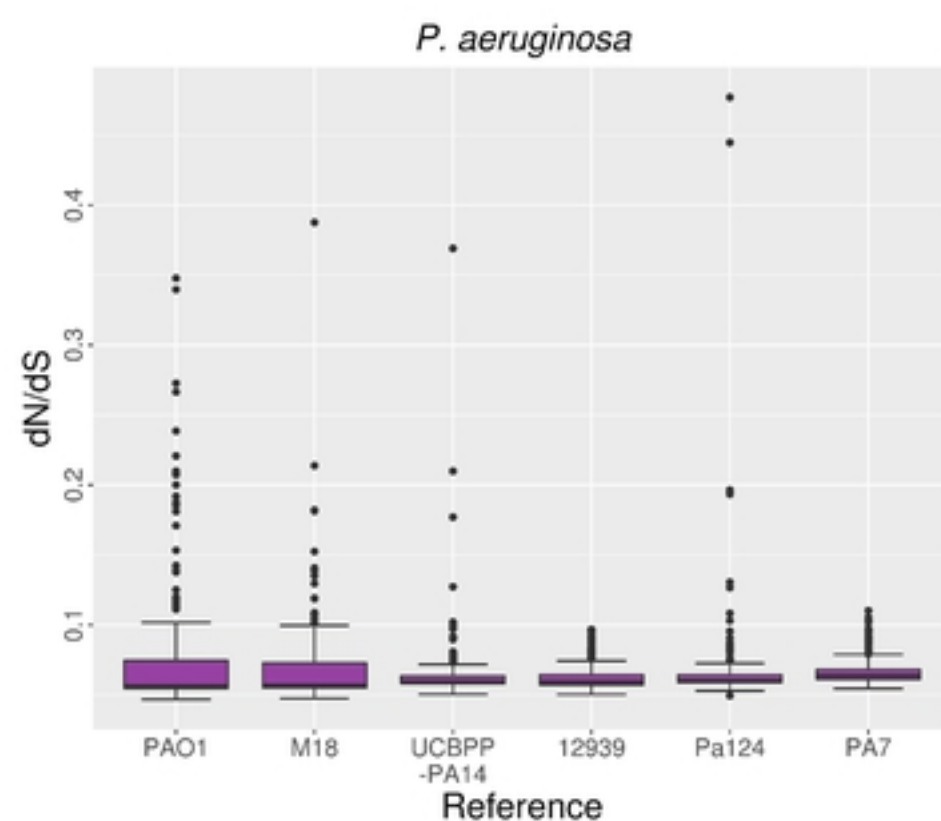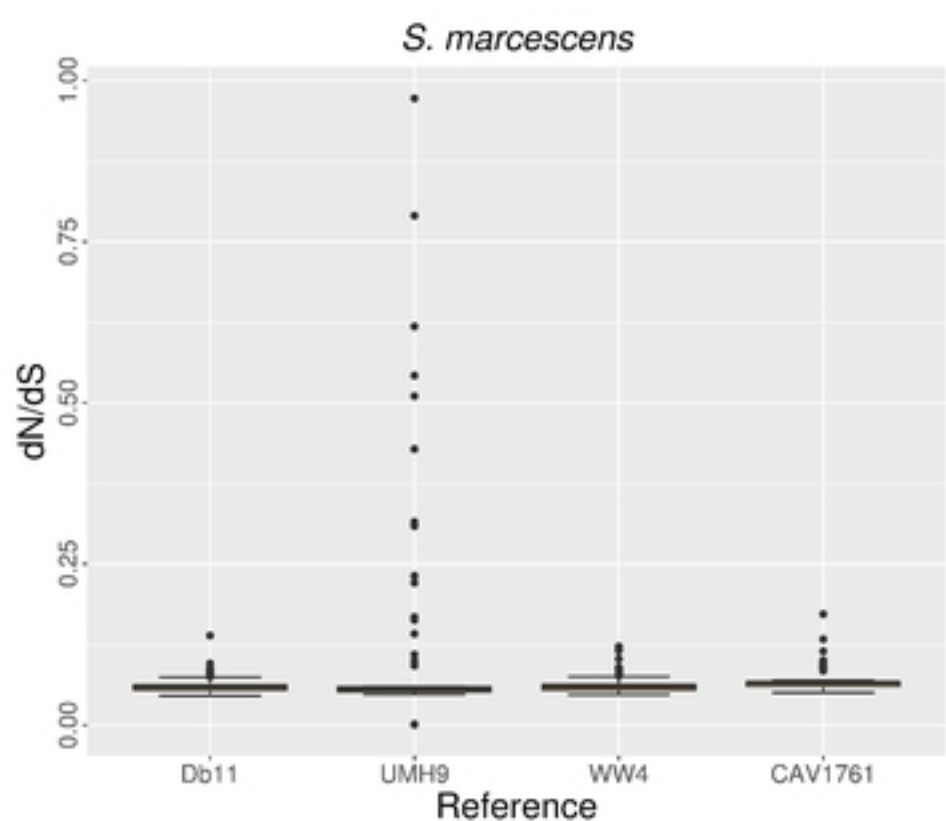

bioRxiv preprint doi: <https://doi.org/10.1101/2020.04.14.041004>; this version posted April 14, 2020. The copyright holder for this preprint (which was not certified by peer review) is the author/funder, who has granted bioRxiv a license to display the preprint in perpetuity. It is made available under aCC-BY 4.0 International license.

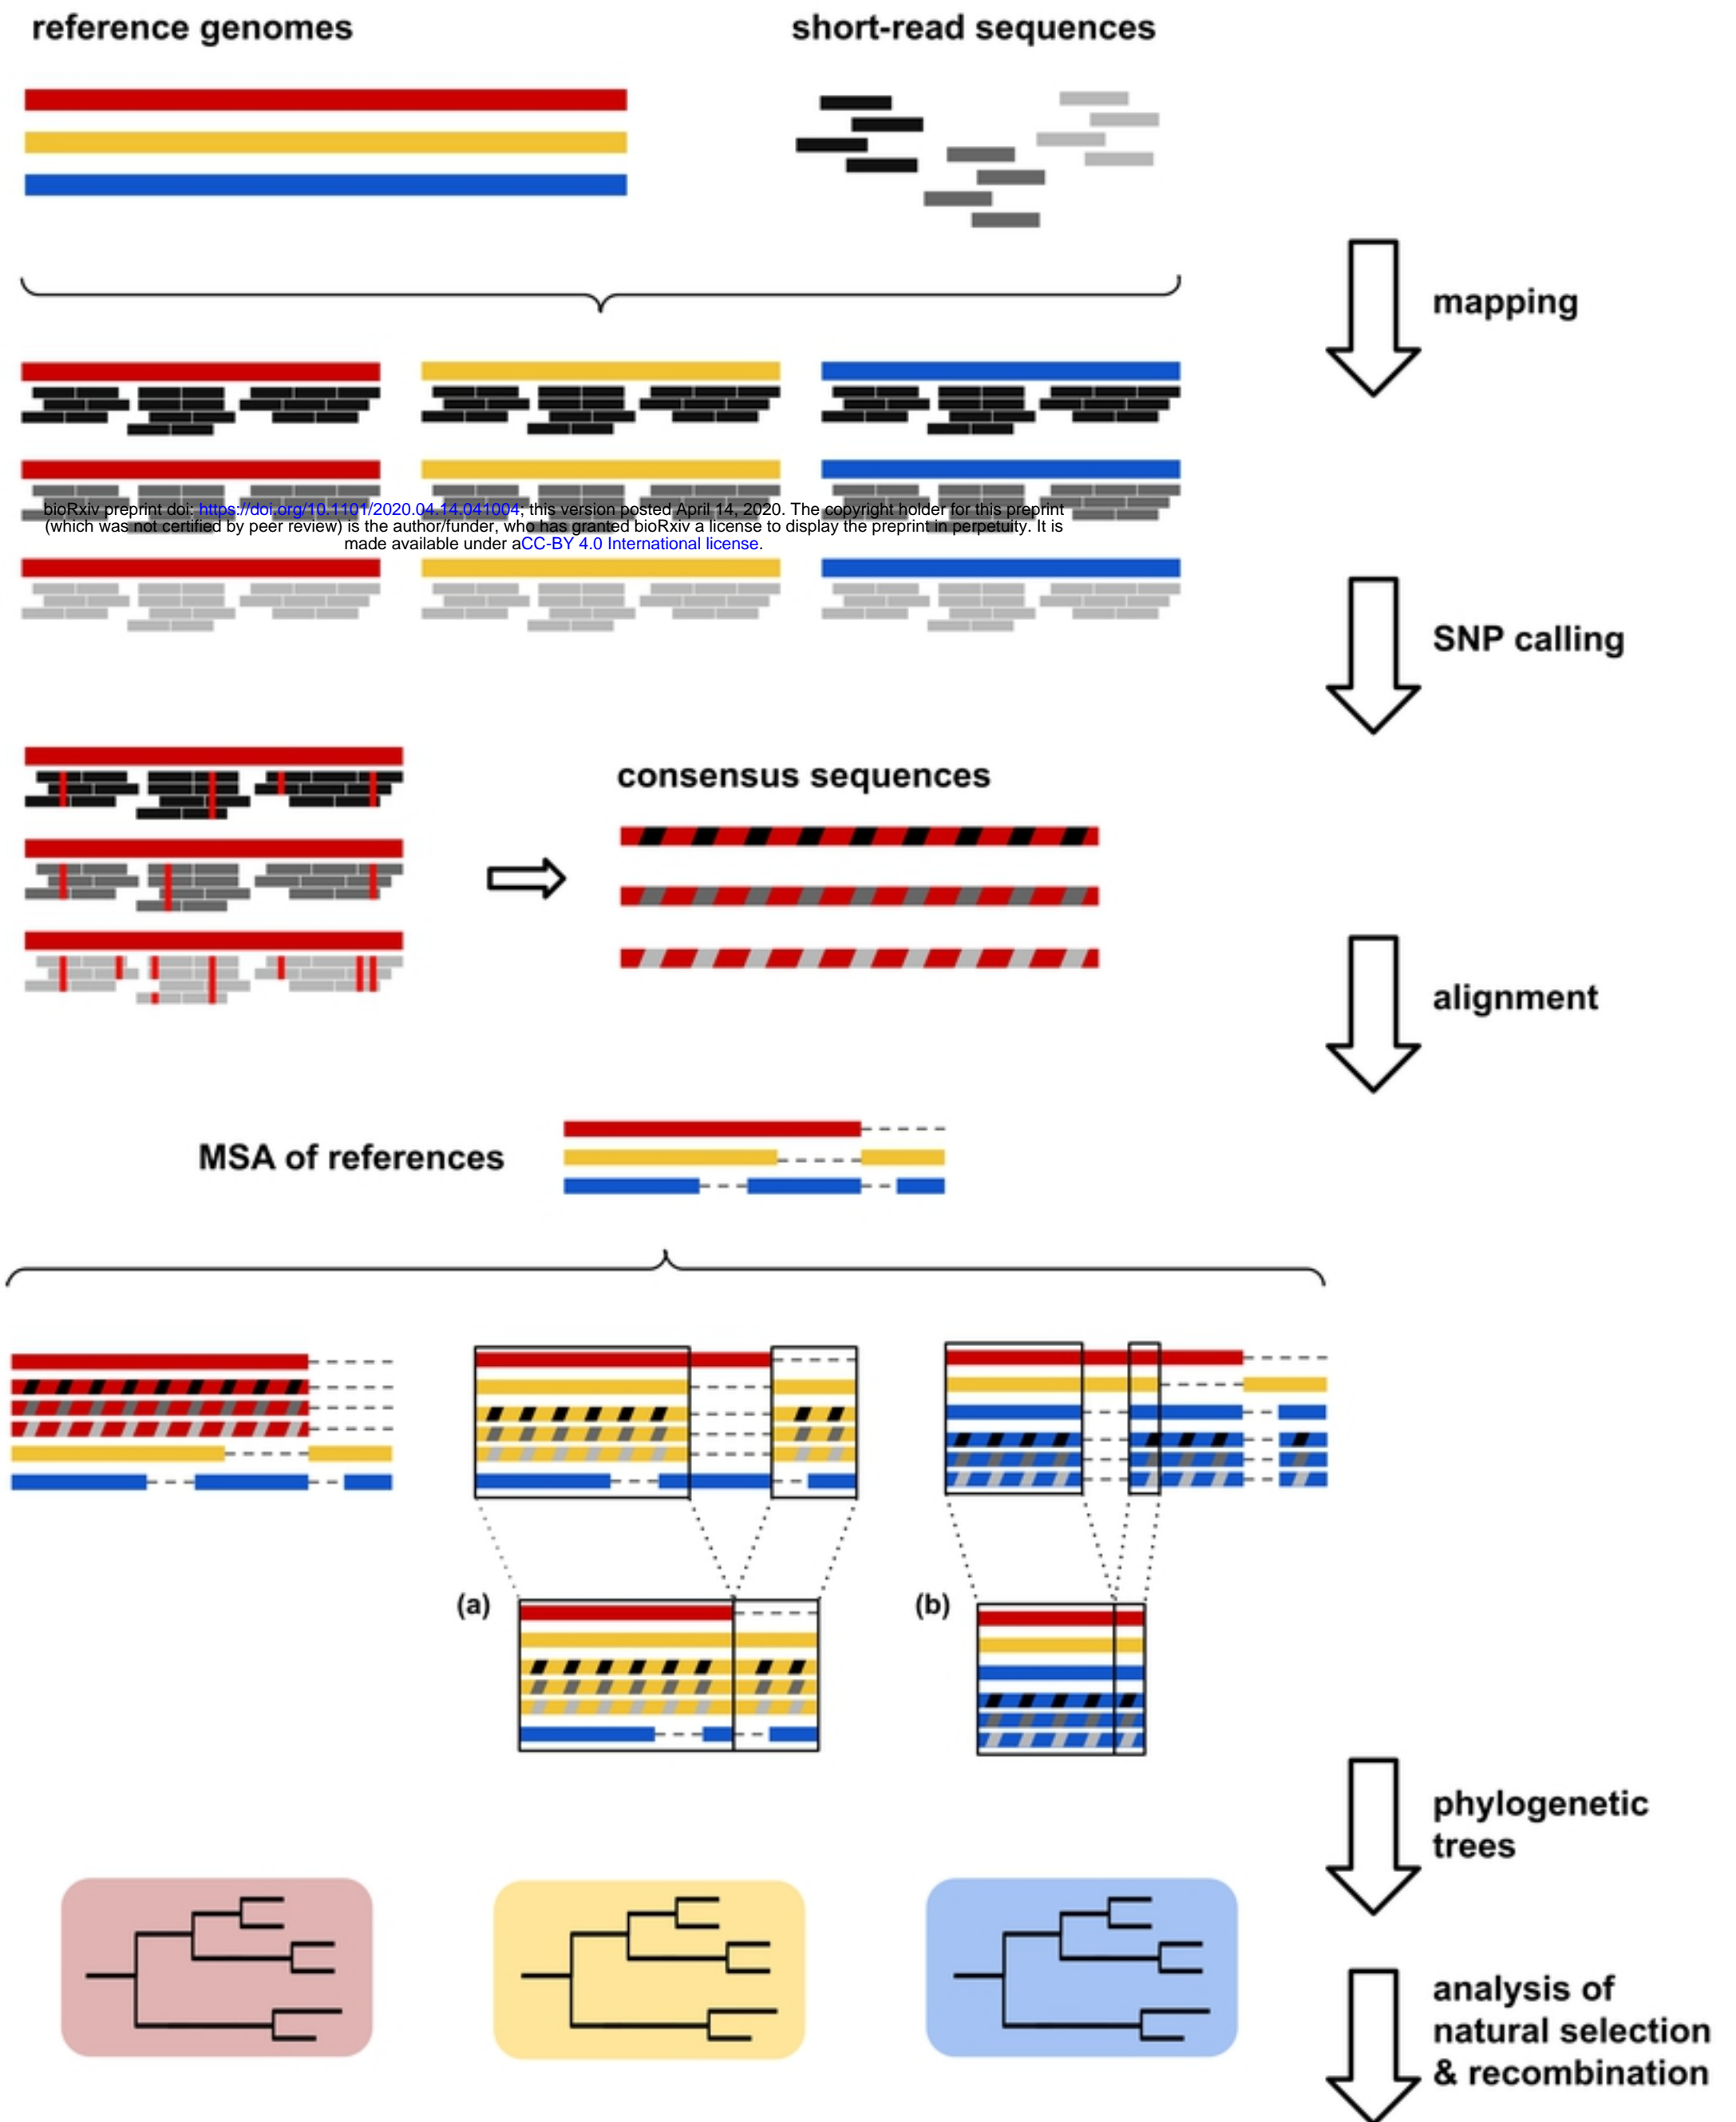

Fig13
